# Supplementary material
Source: PubMed Central journal article supplement (PMC5161207)
Supplement: jciinsight-1-89073-s002.pdf [file jciinsight-1-89073-s002.pdf]

# Patient 3

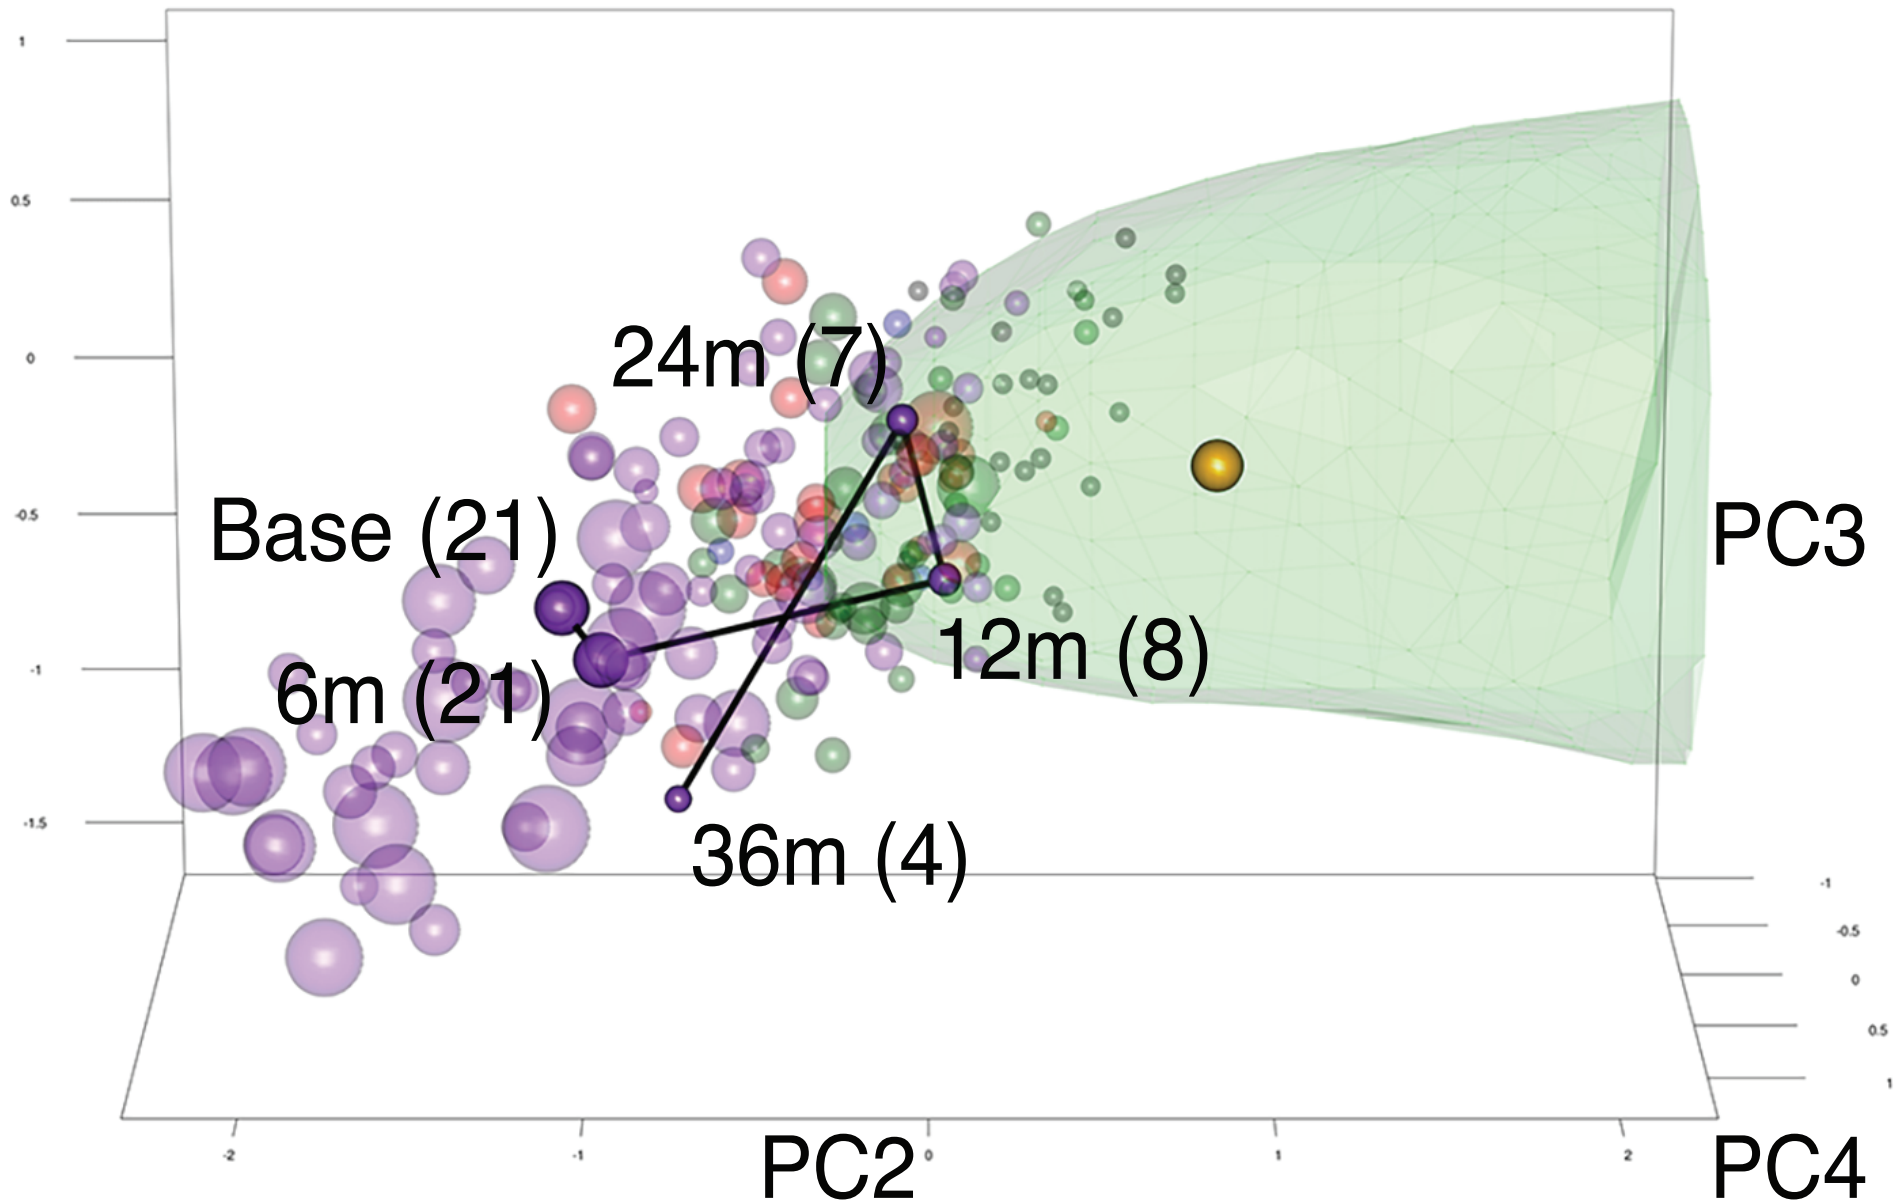

# Patient 5

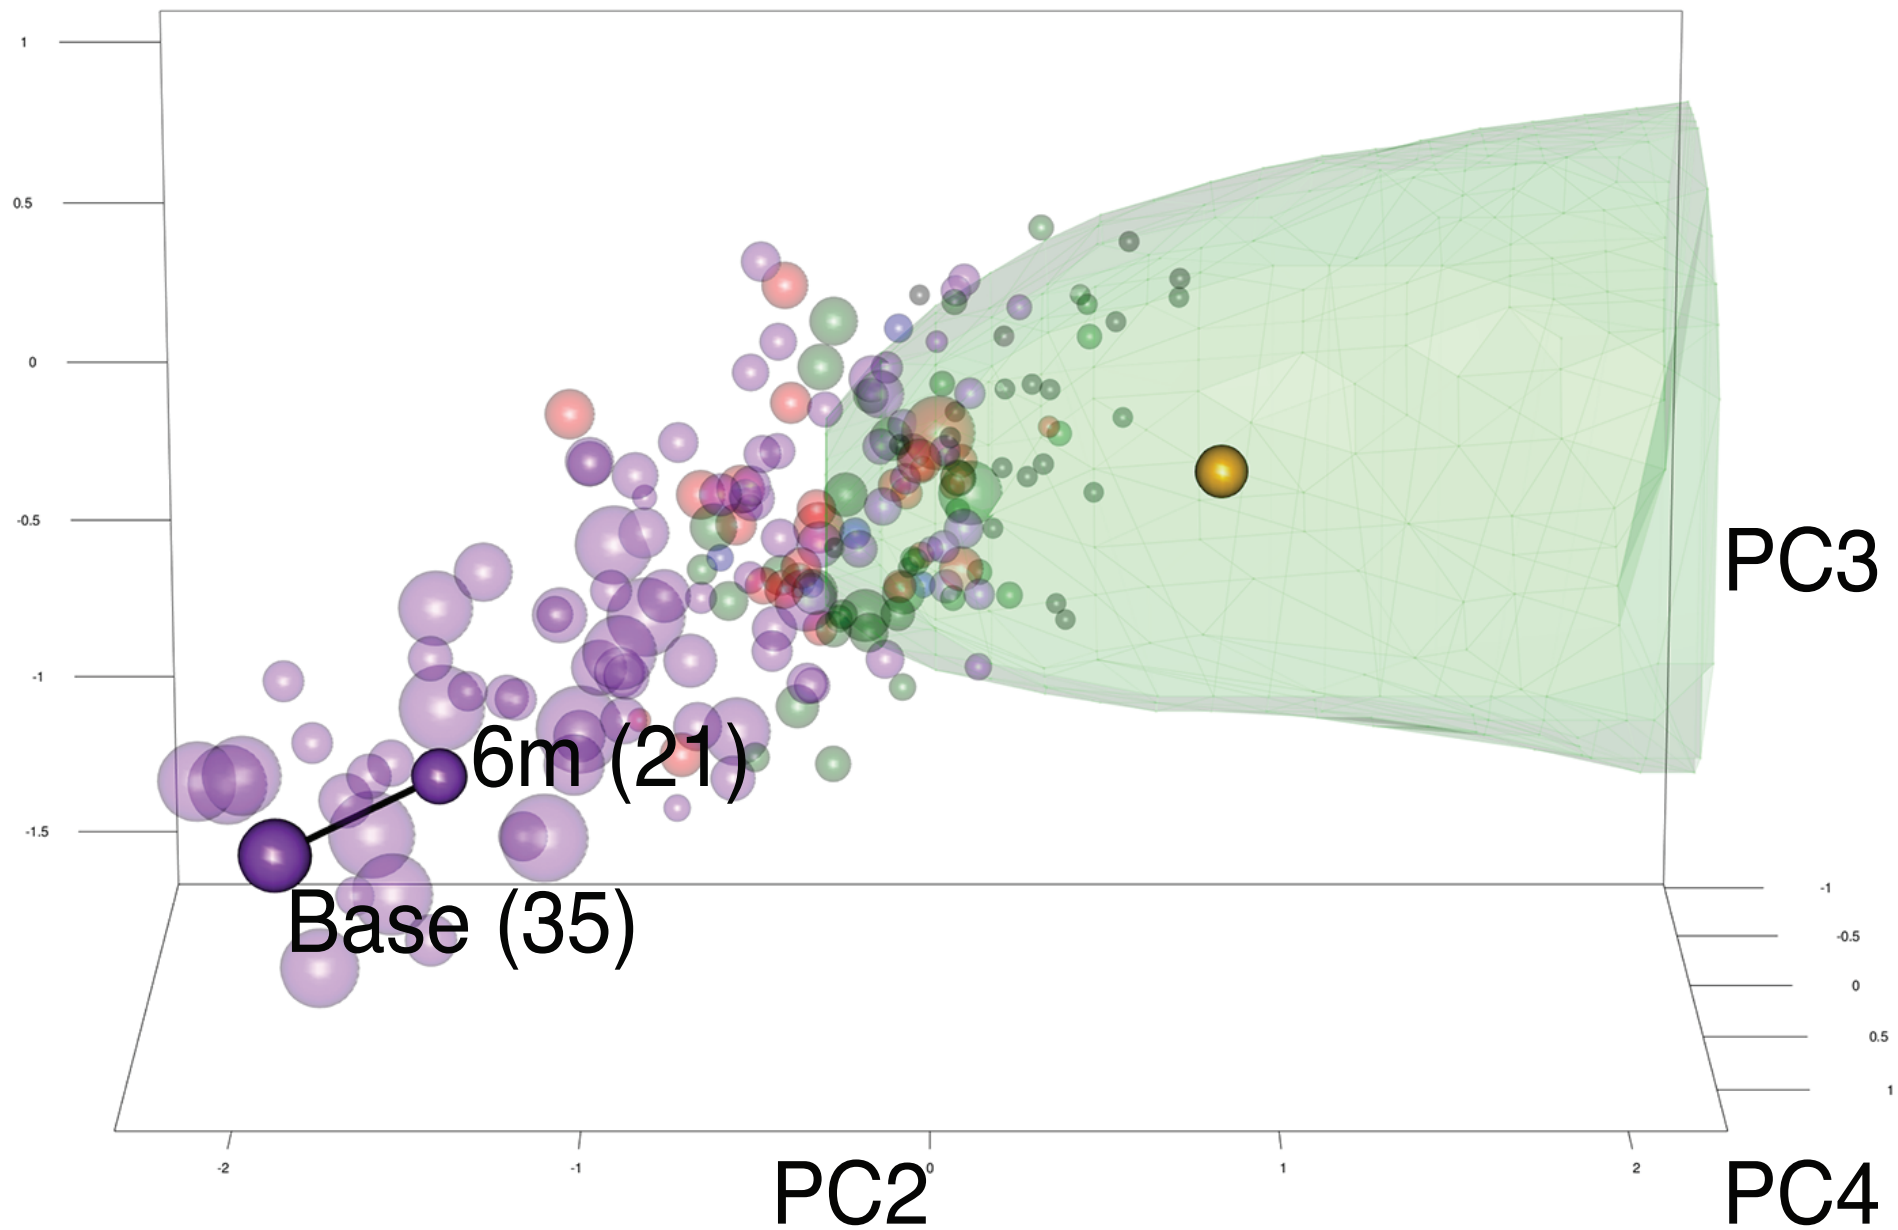

# Patient 7

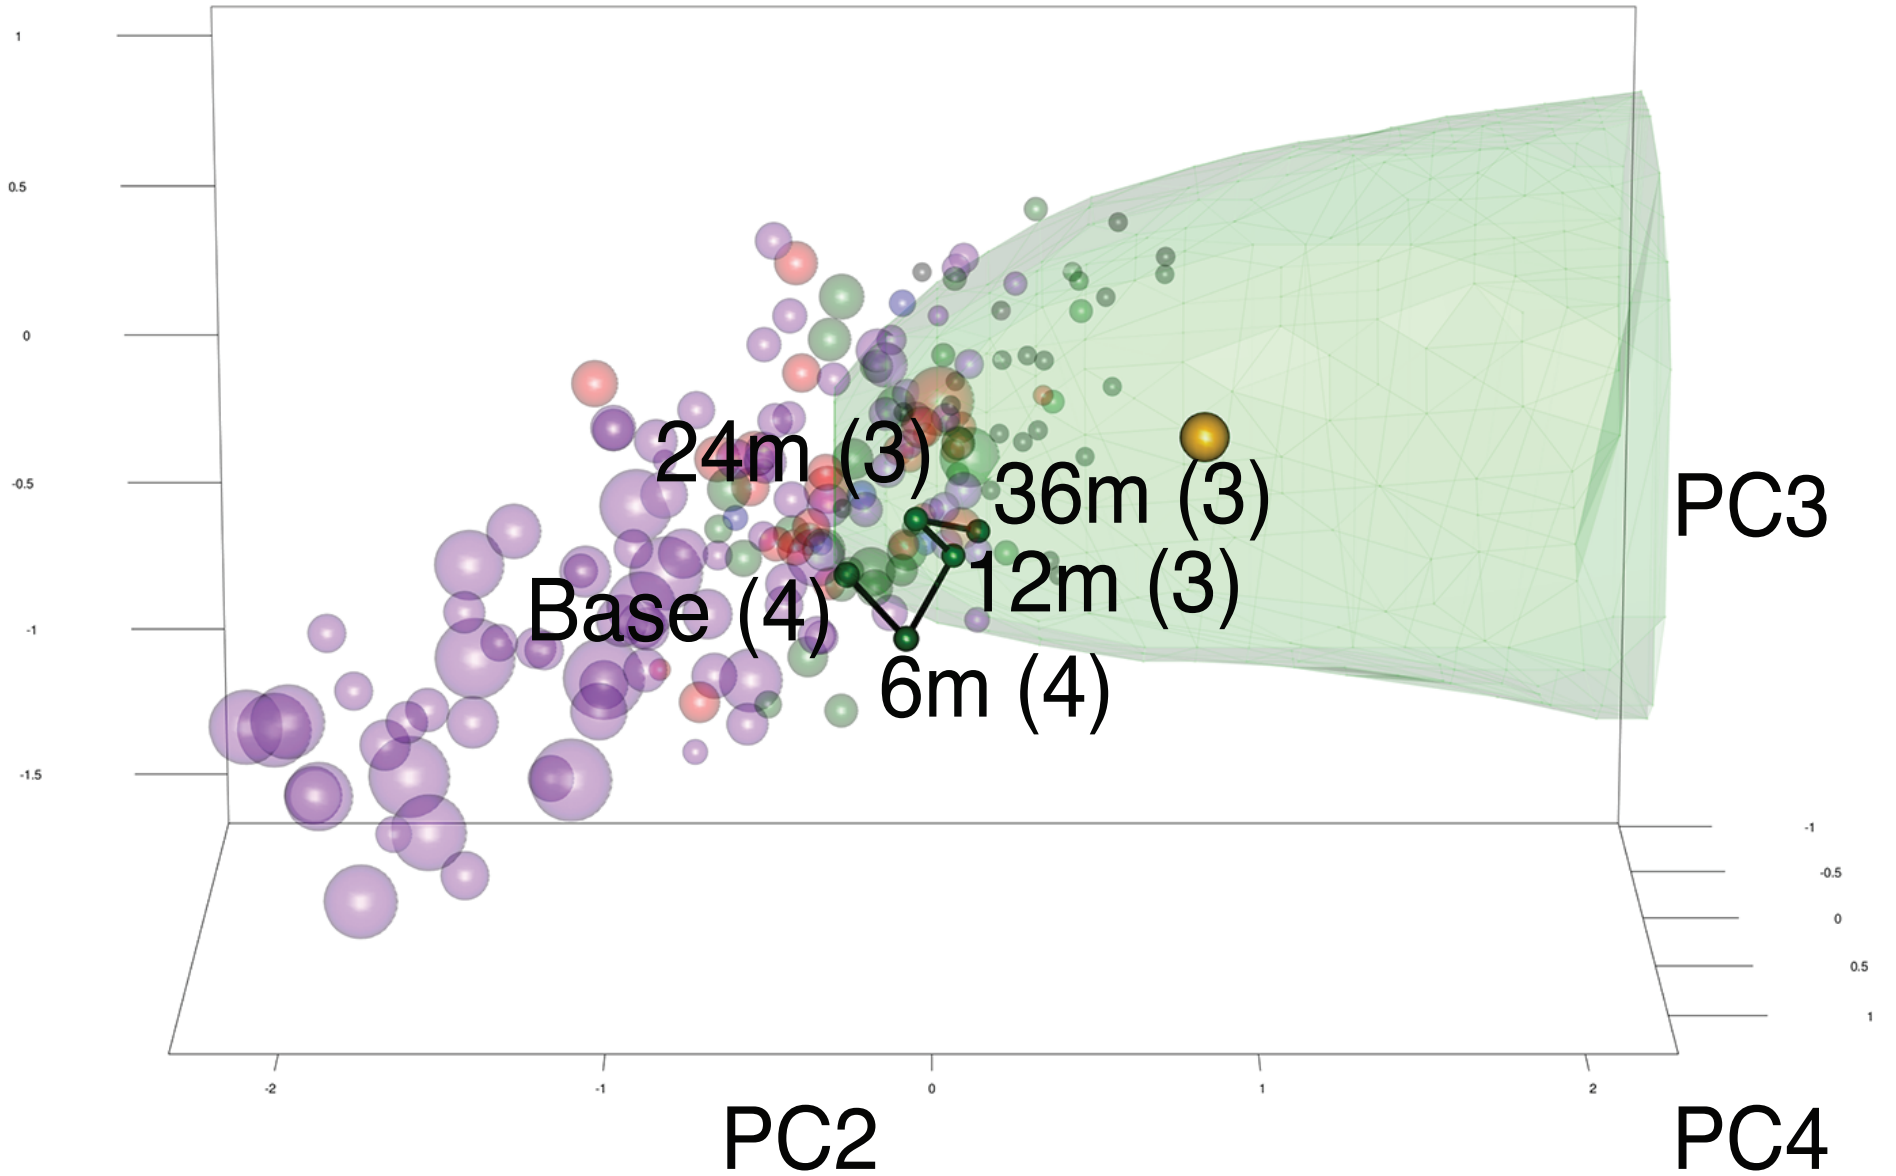

# Patient 8

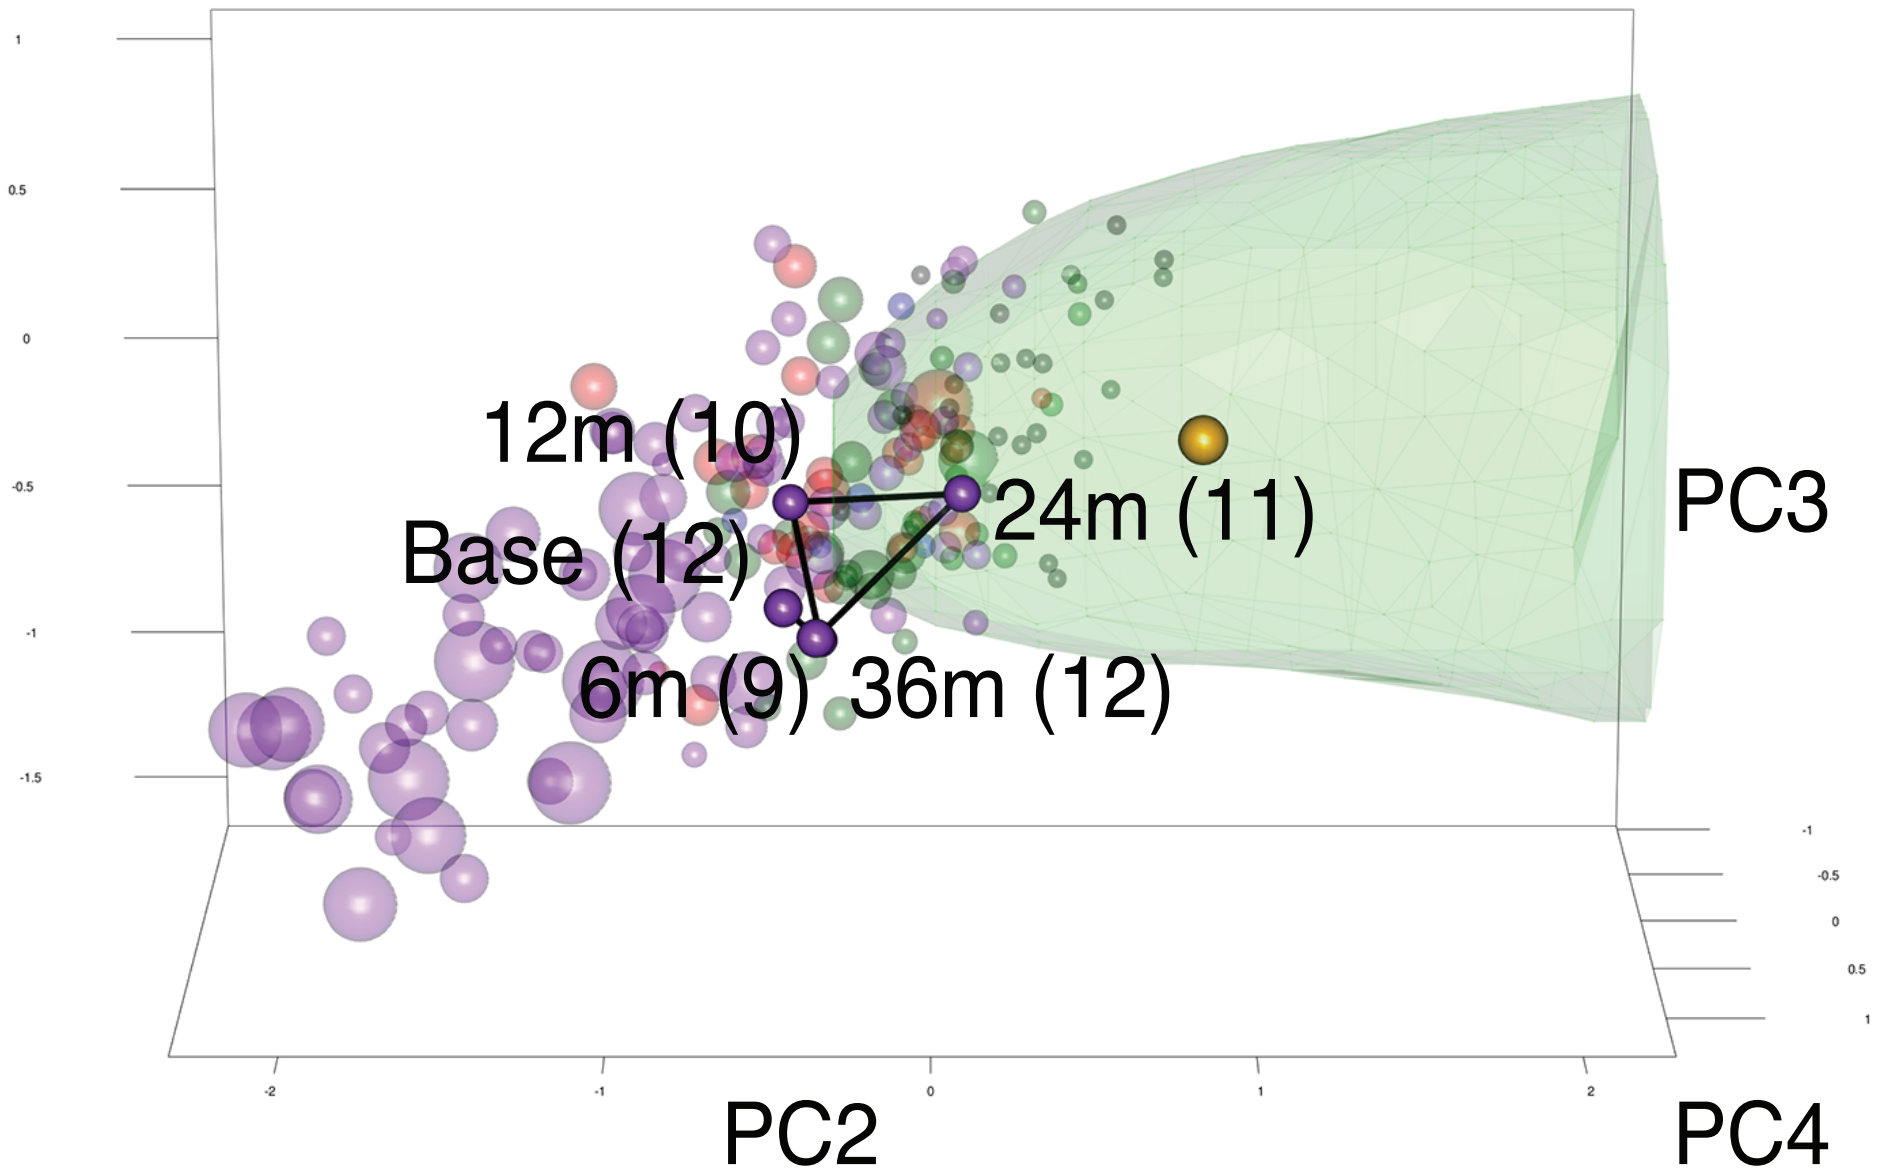

# Patient 10

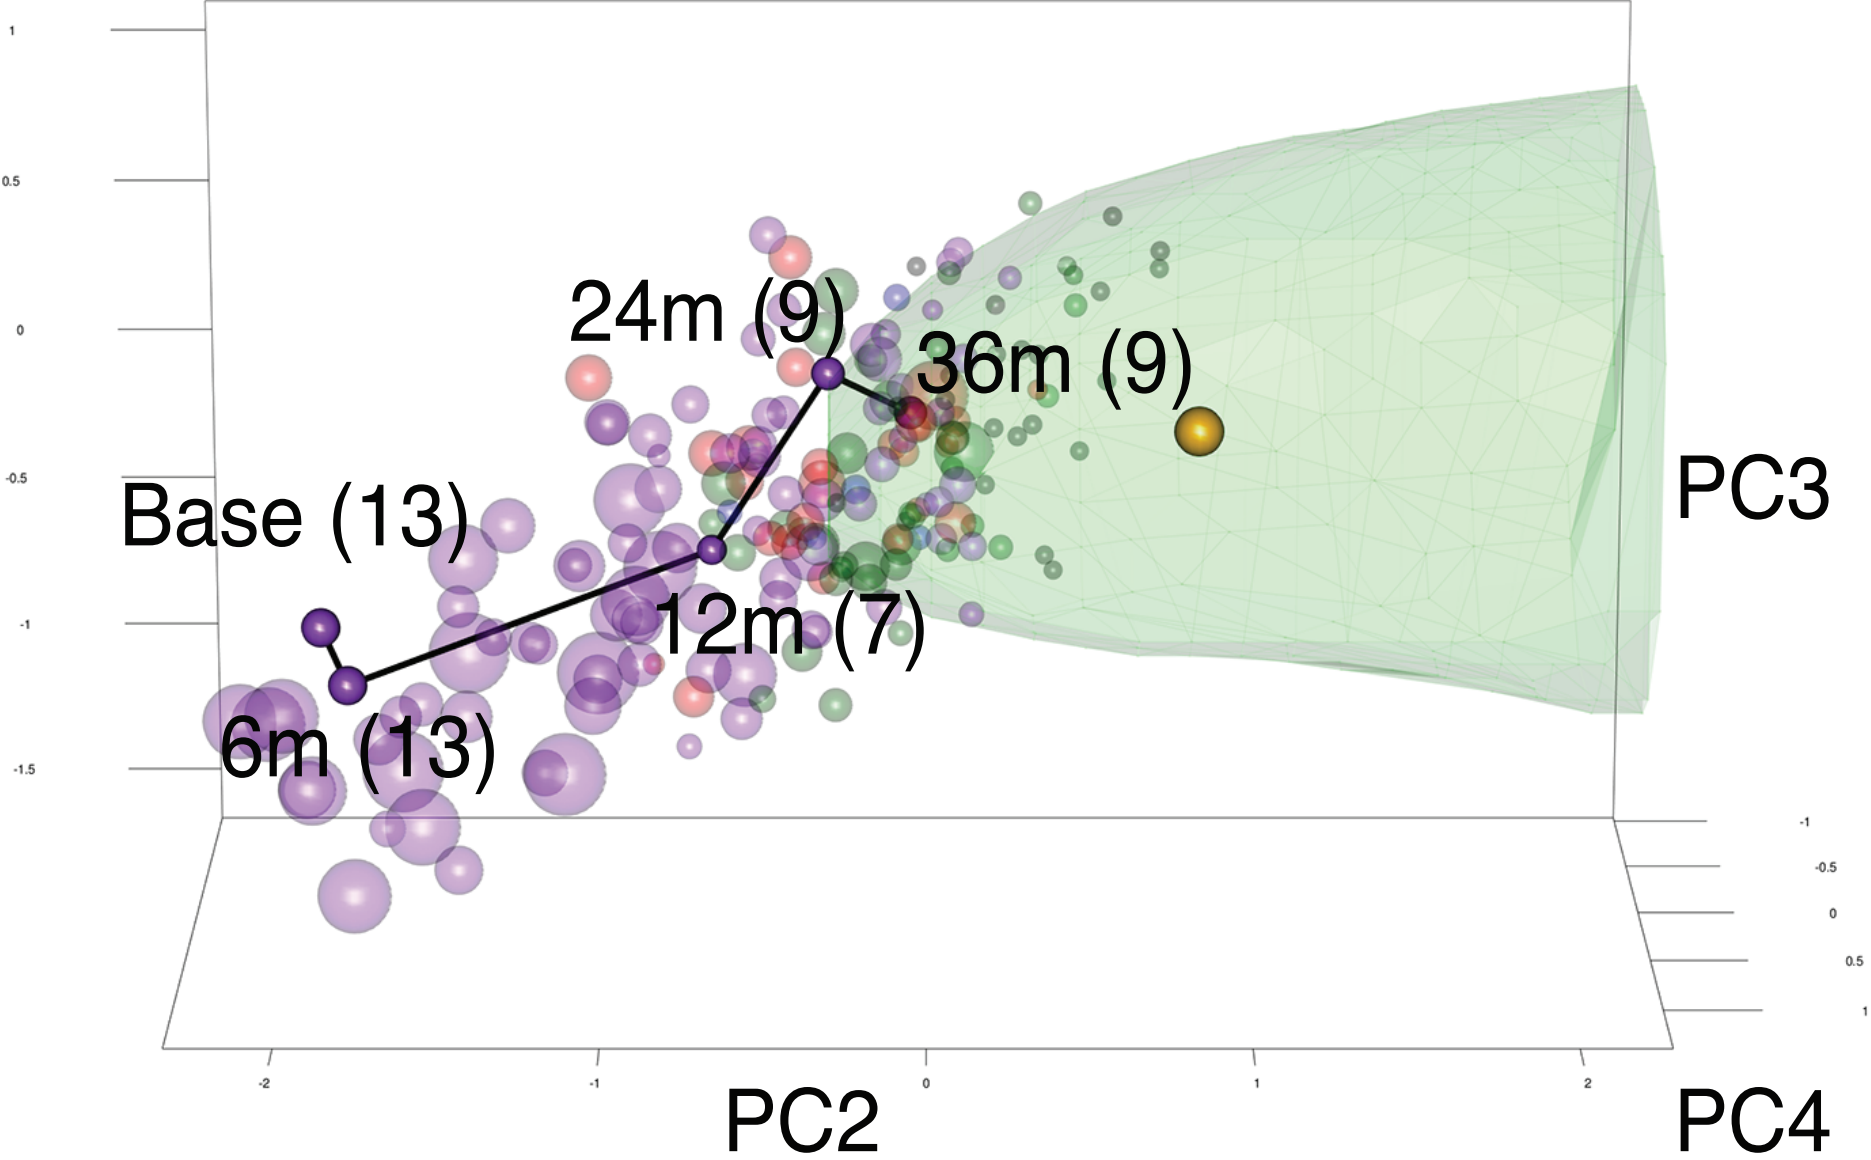

# Patient 12

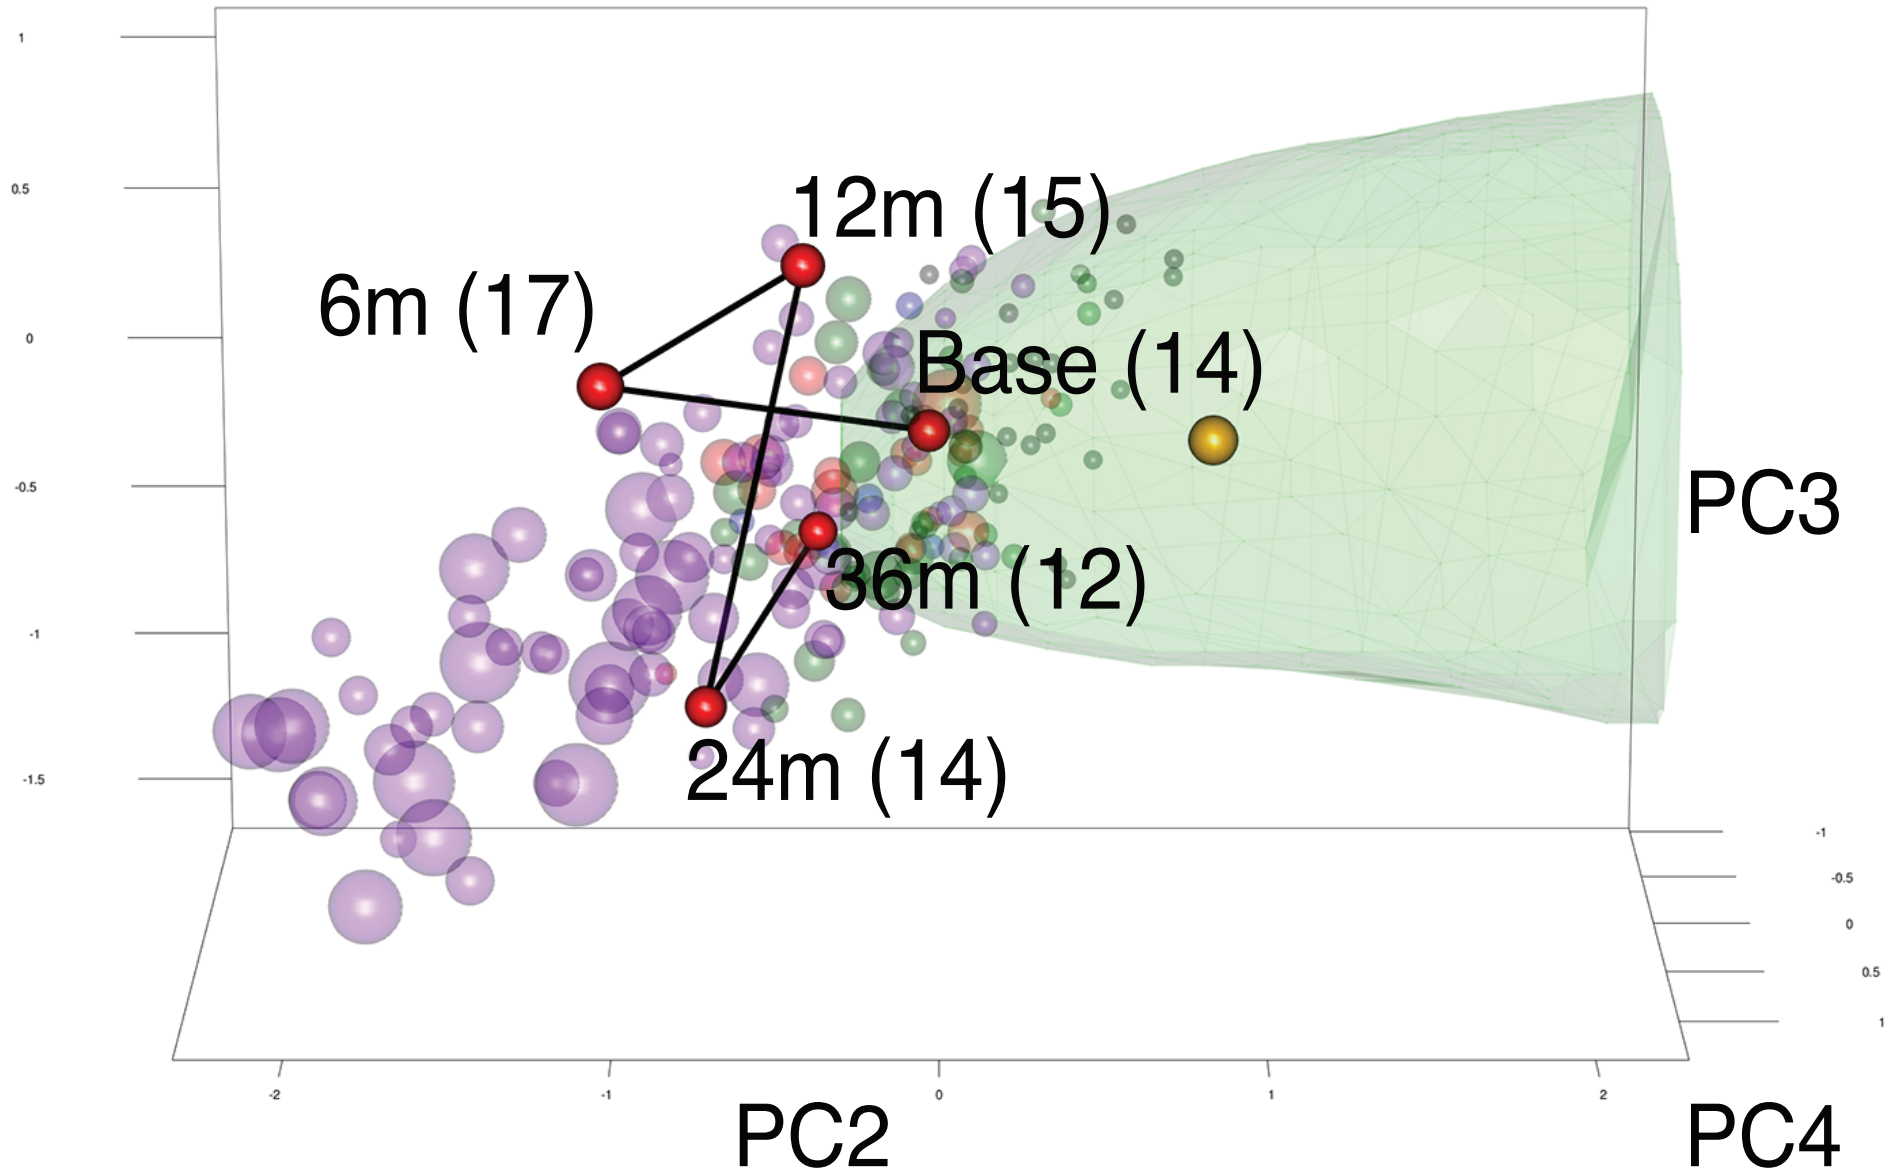

# Patient 14

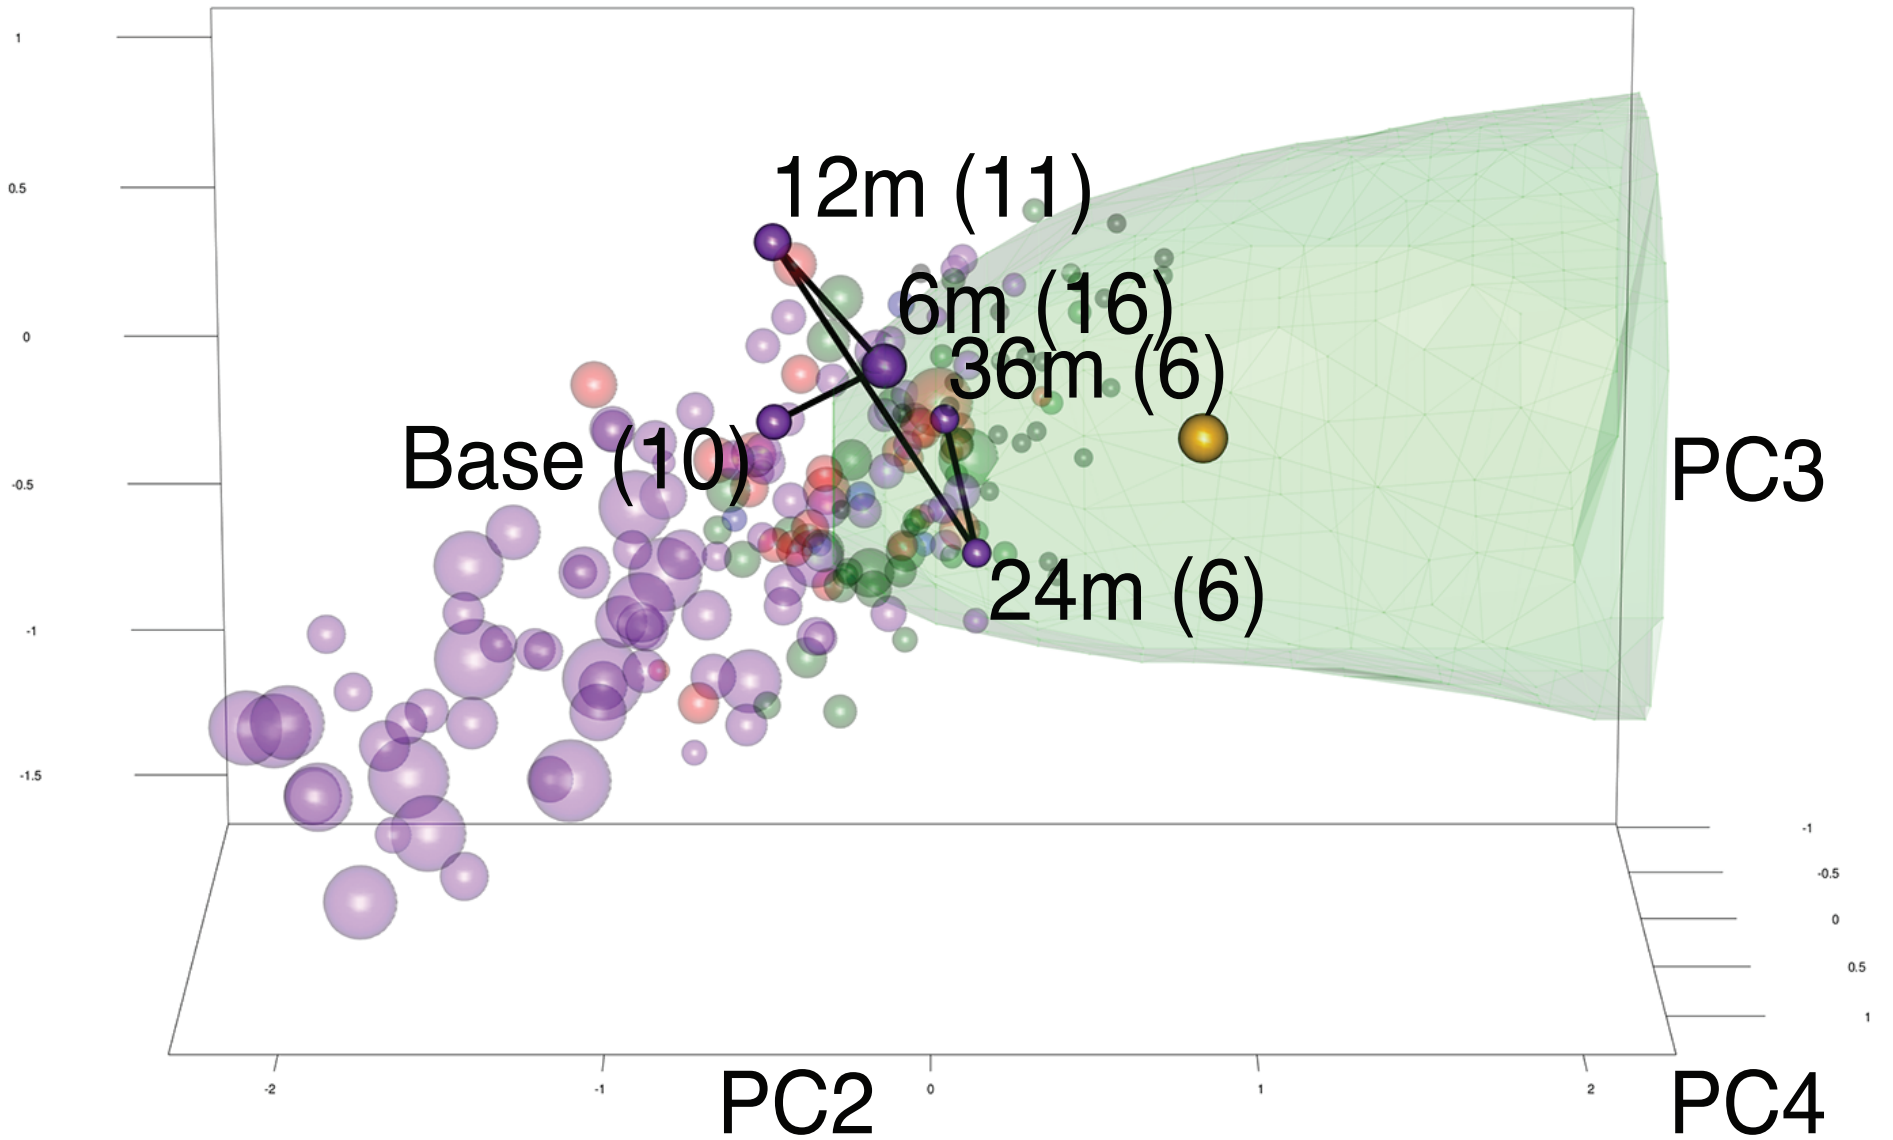

# Patient 15

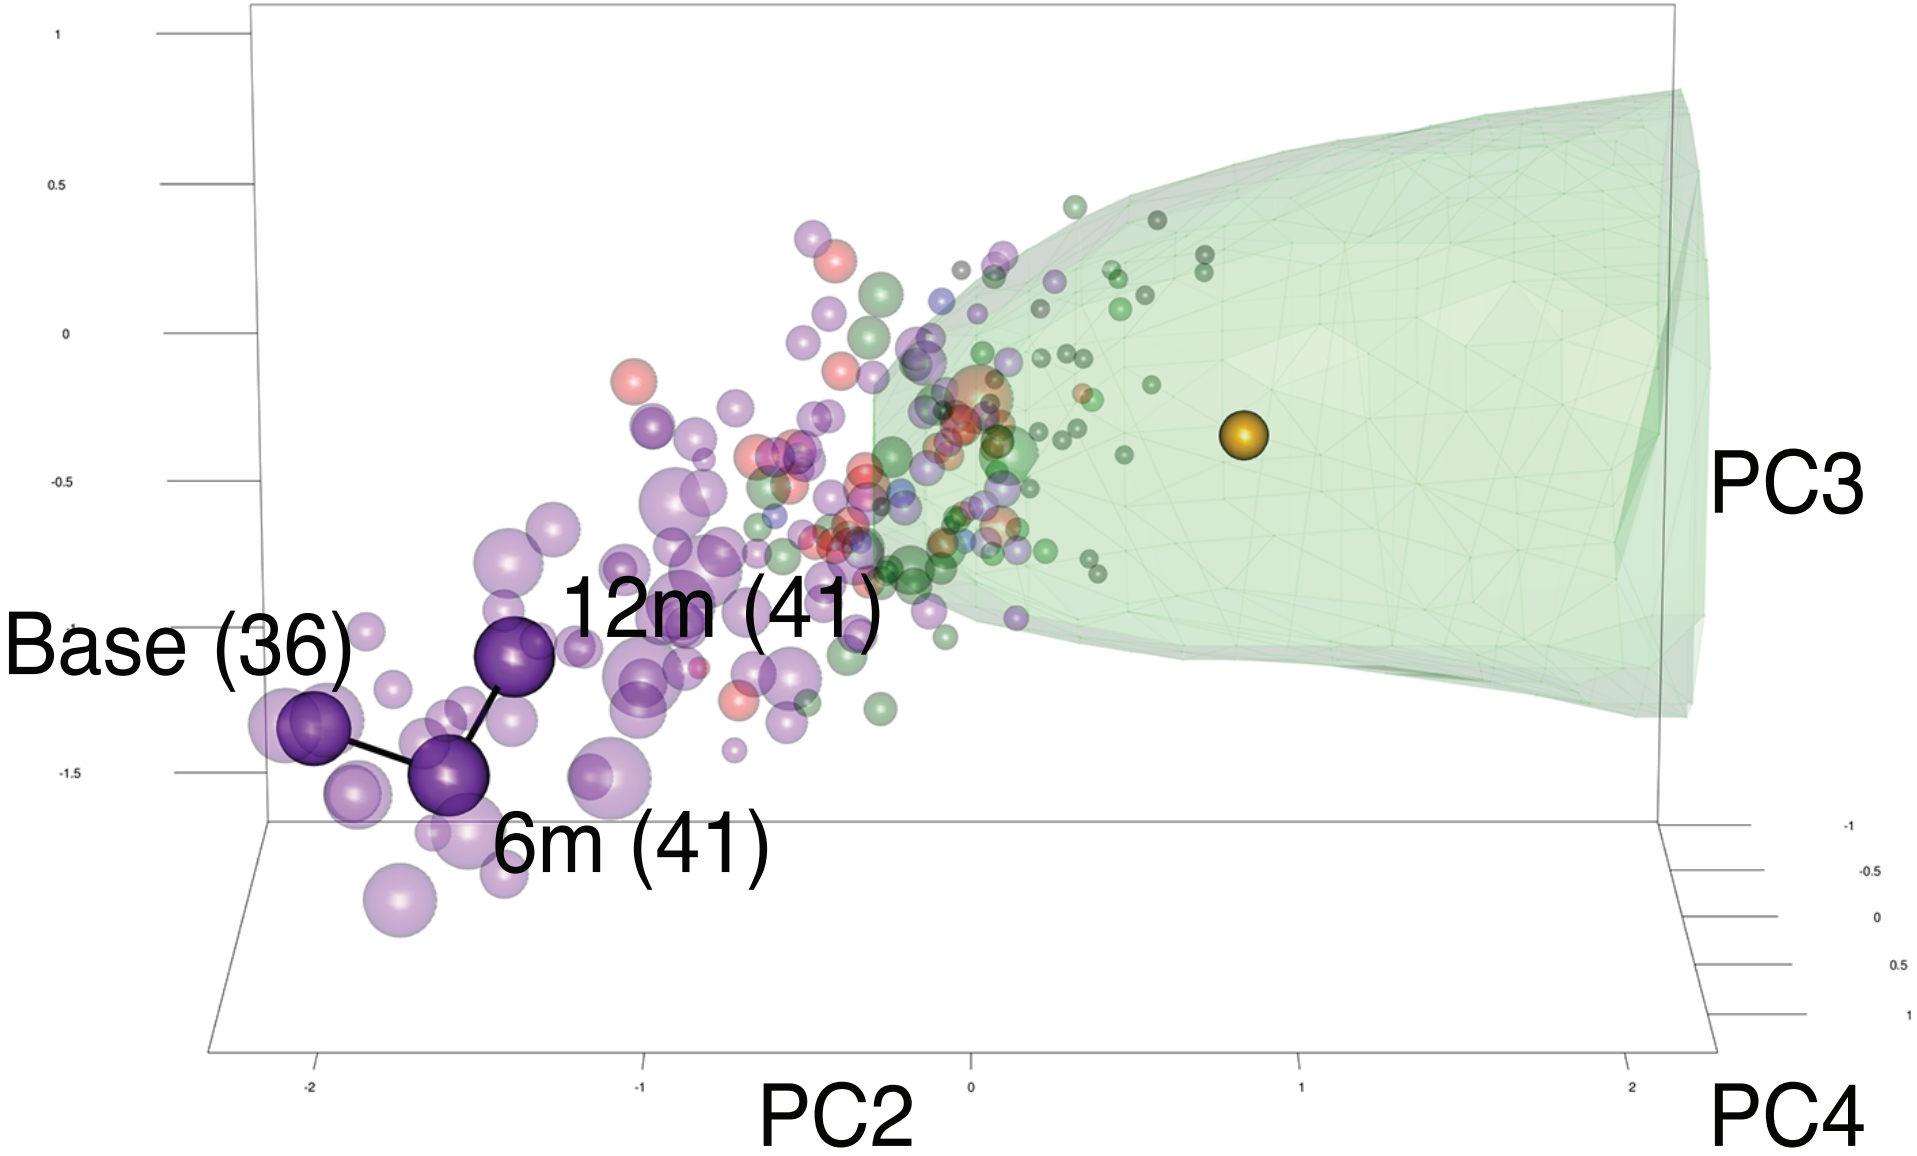



# Patient 16

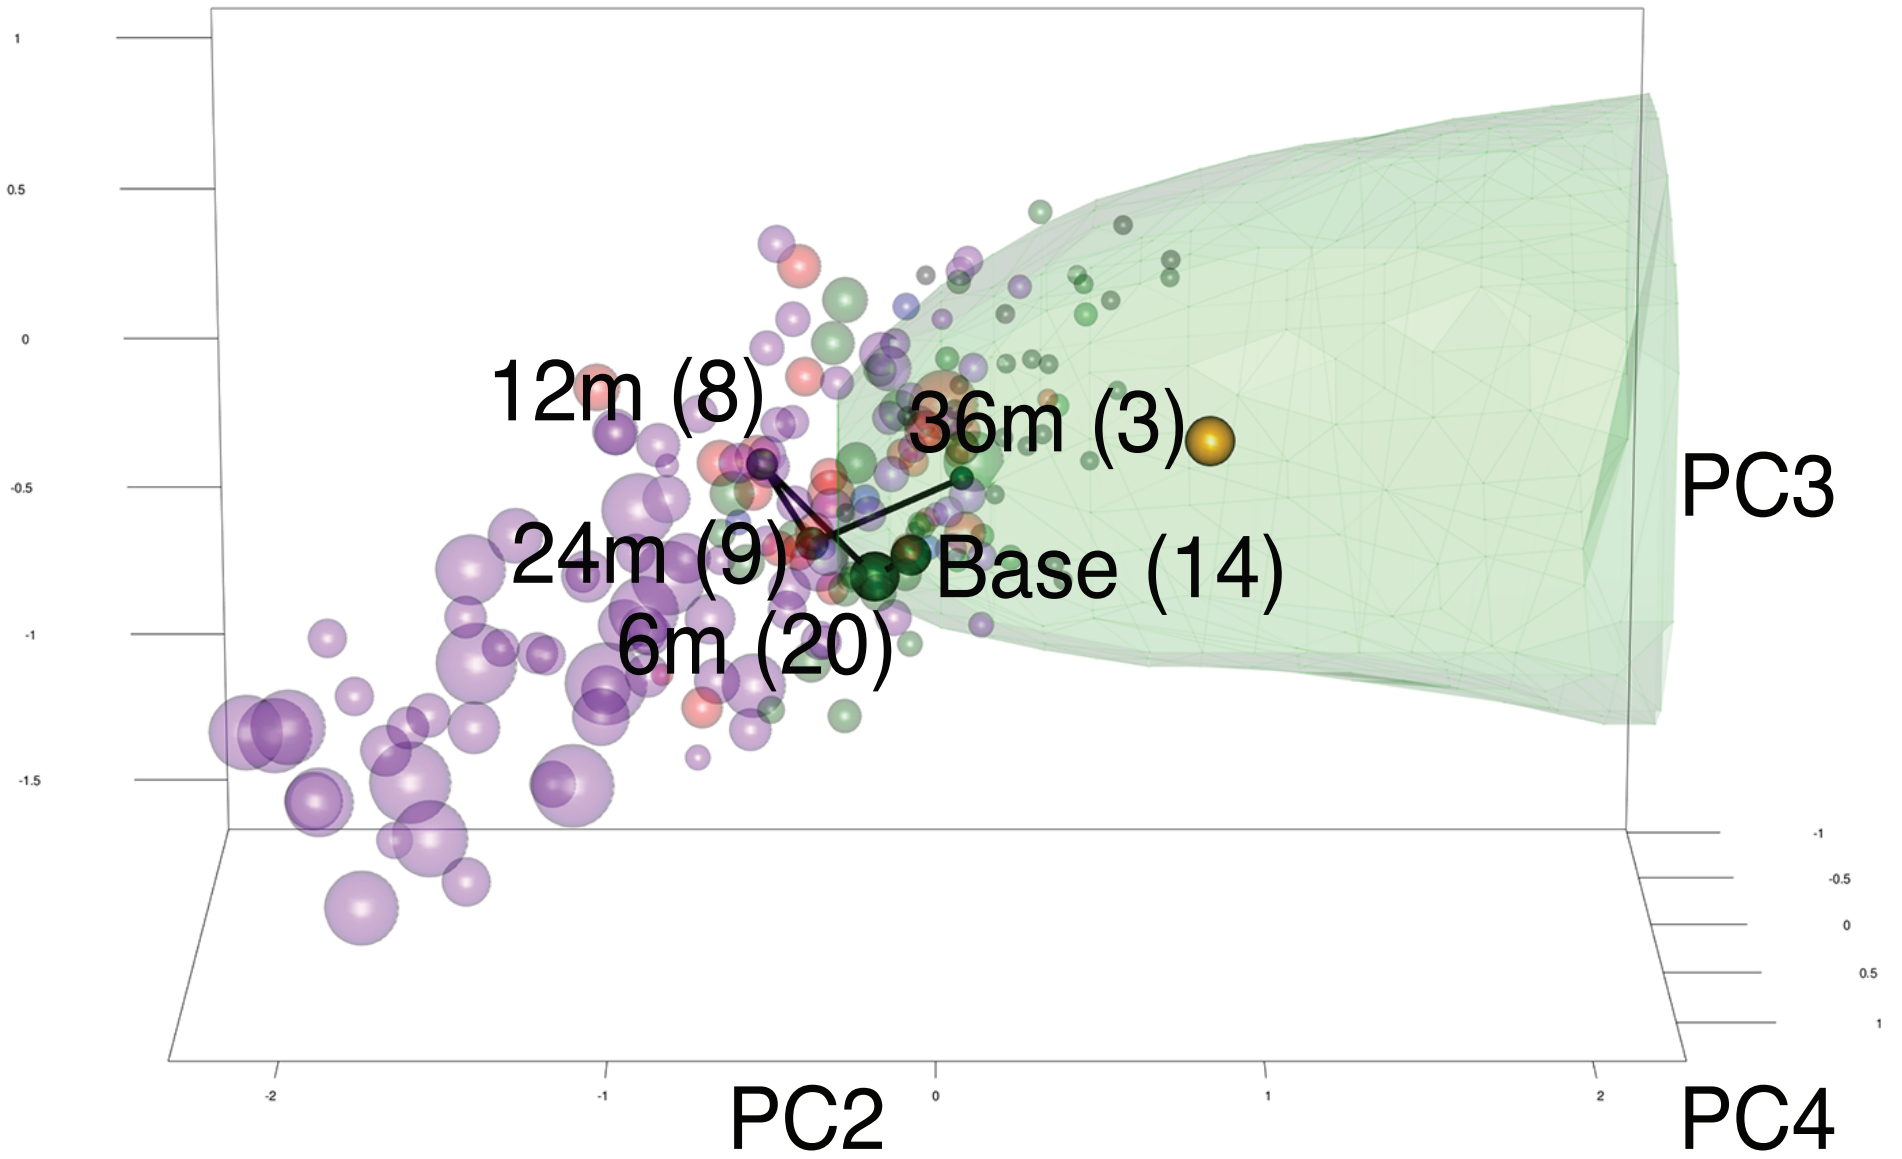

# Patient 18

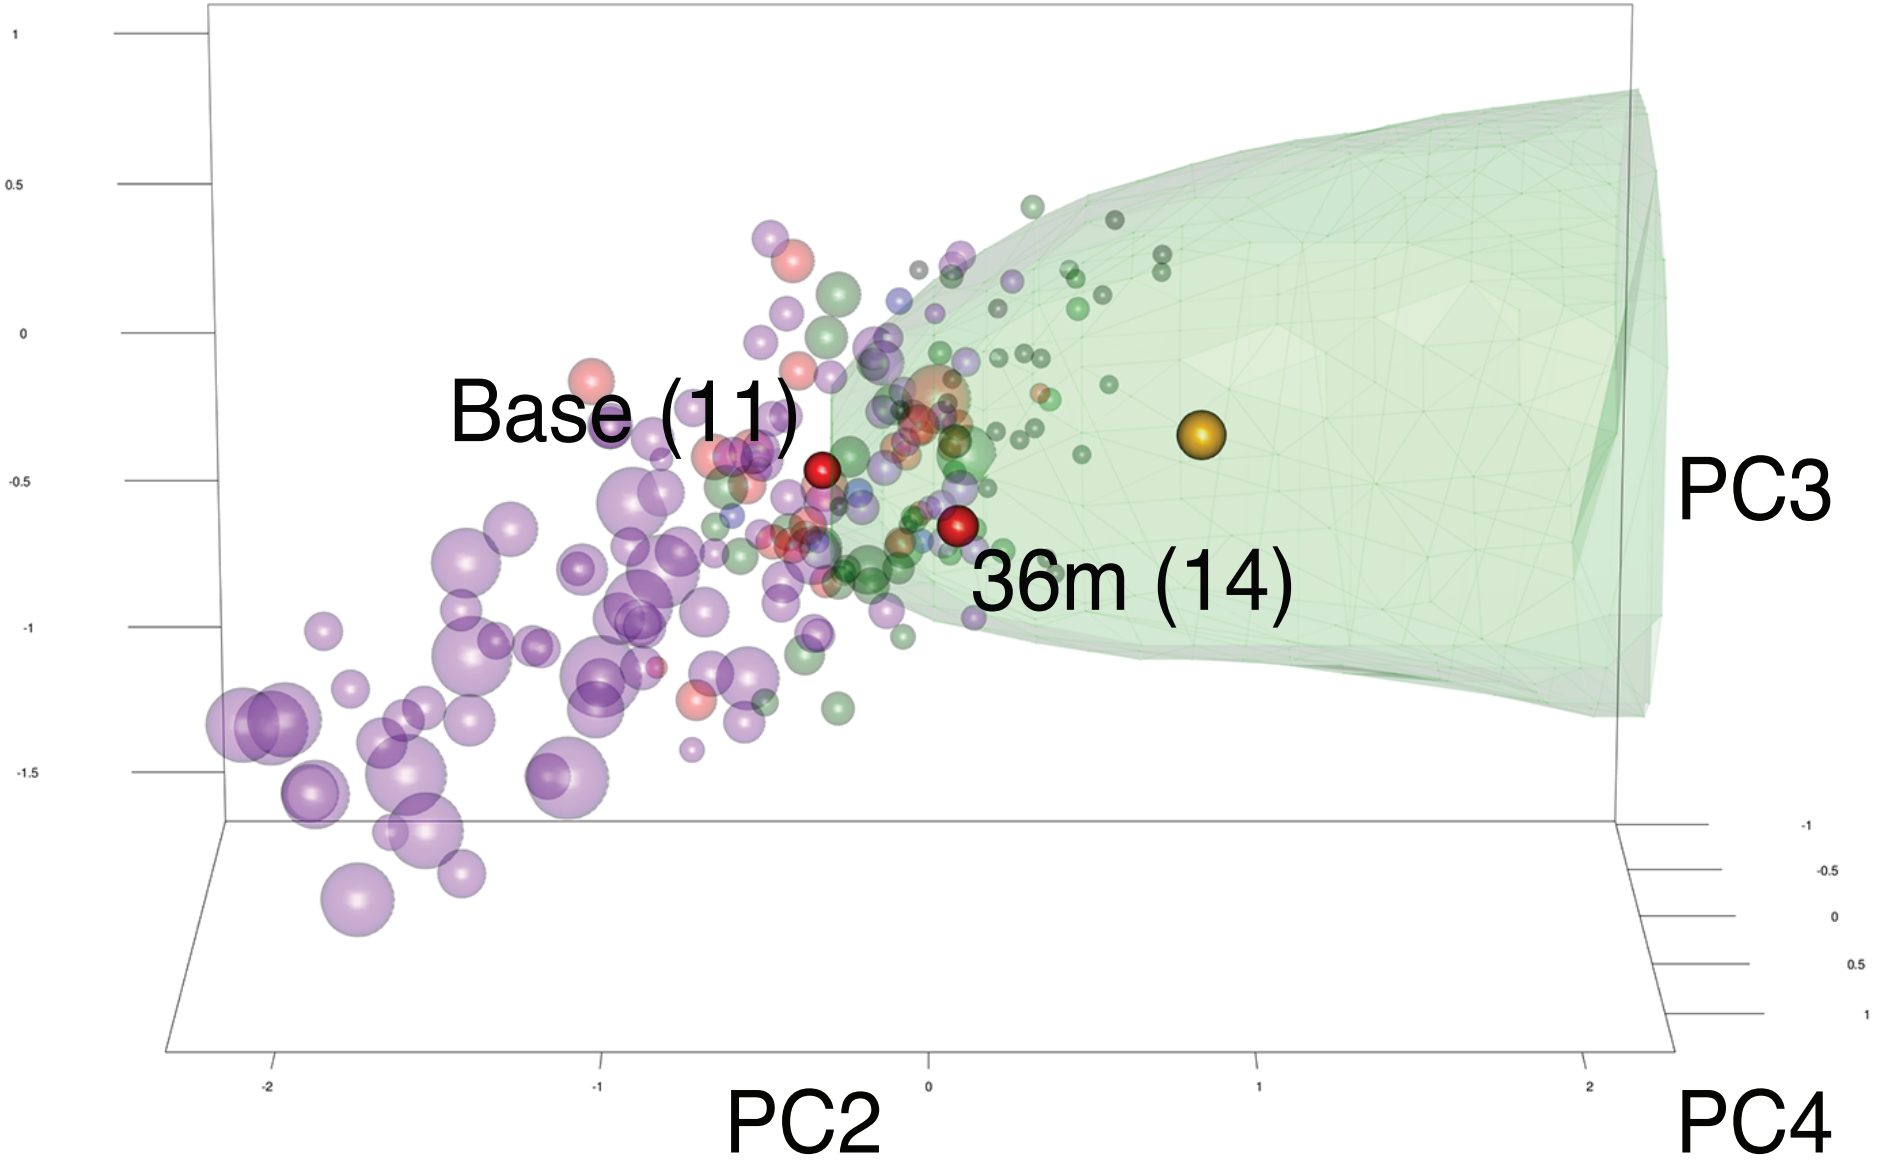

# Patient 20

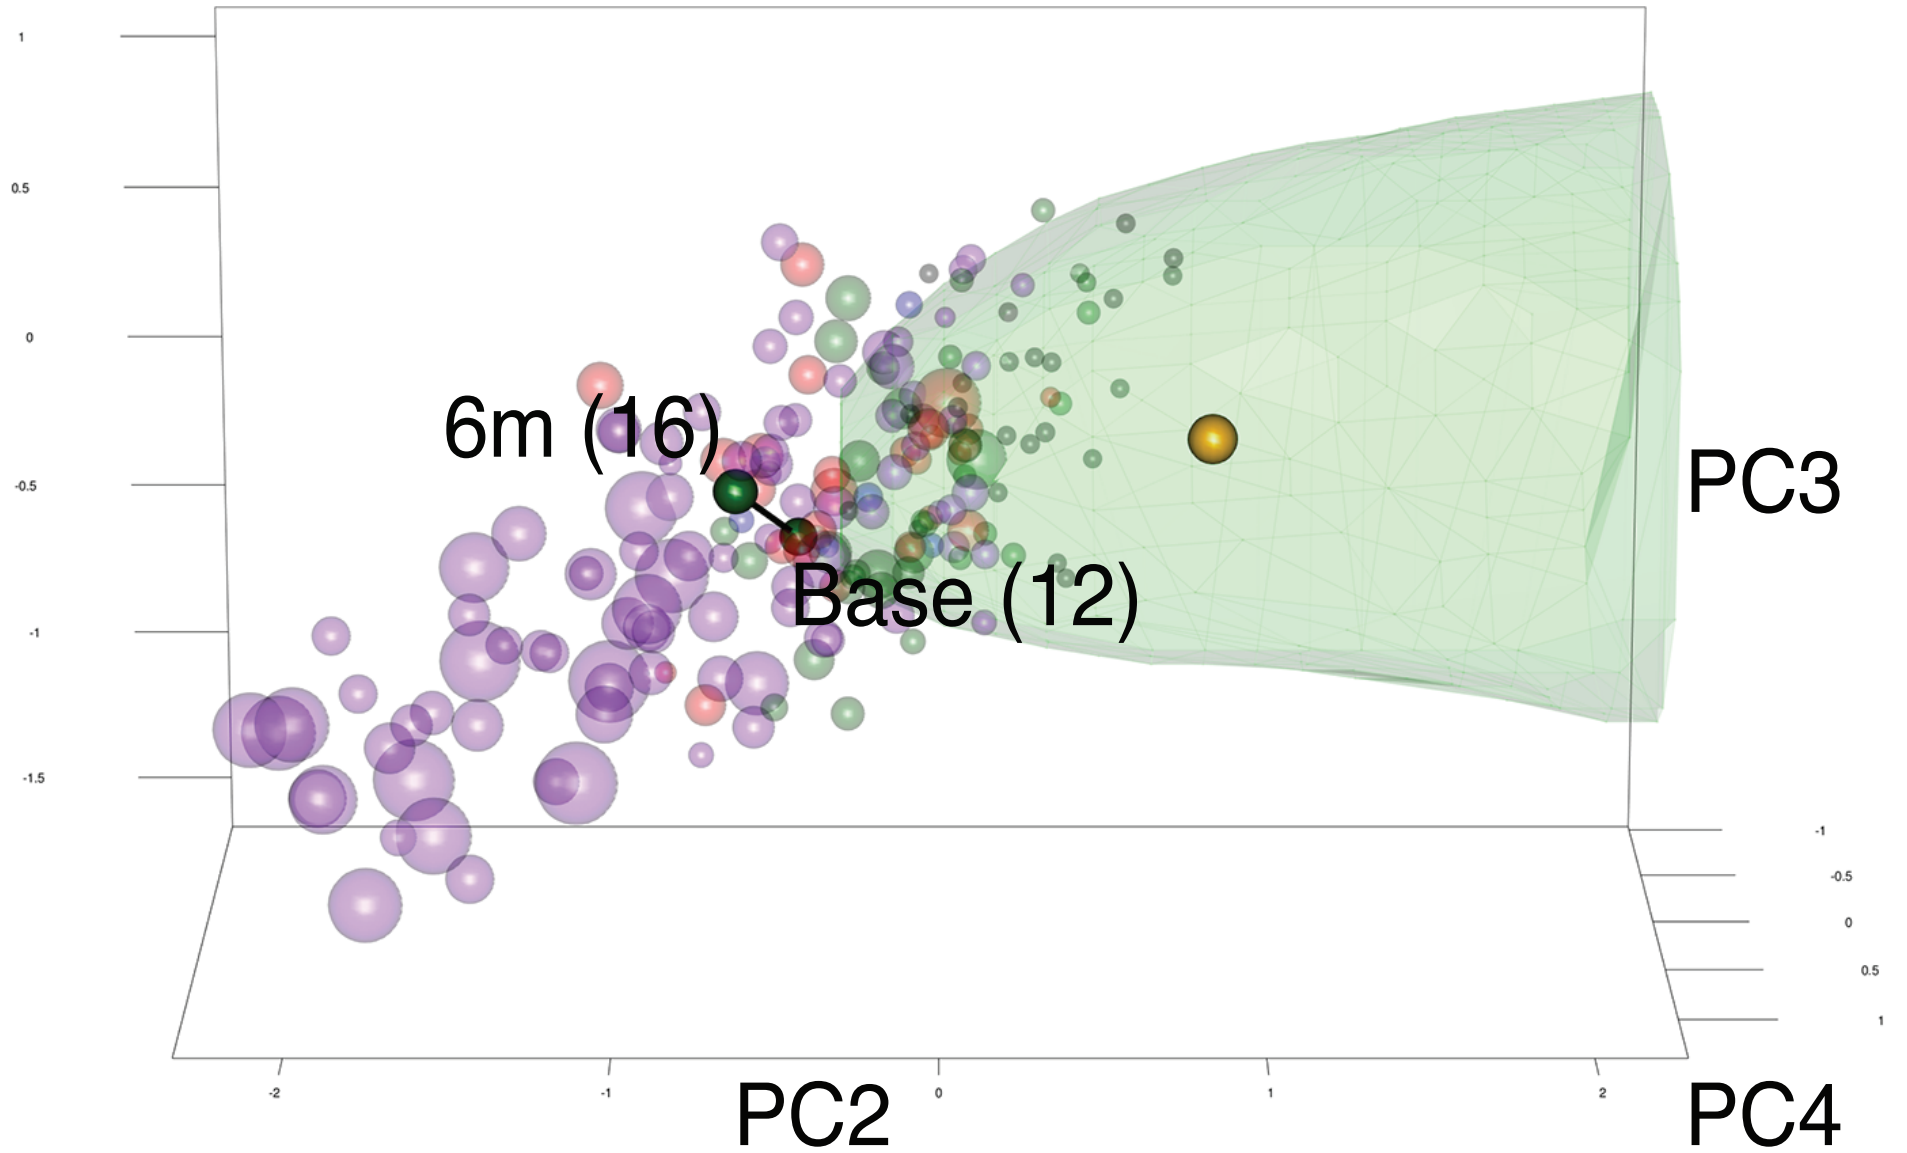

# Patient 21

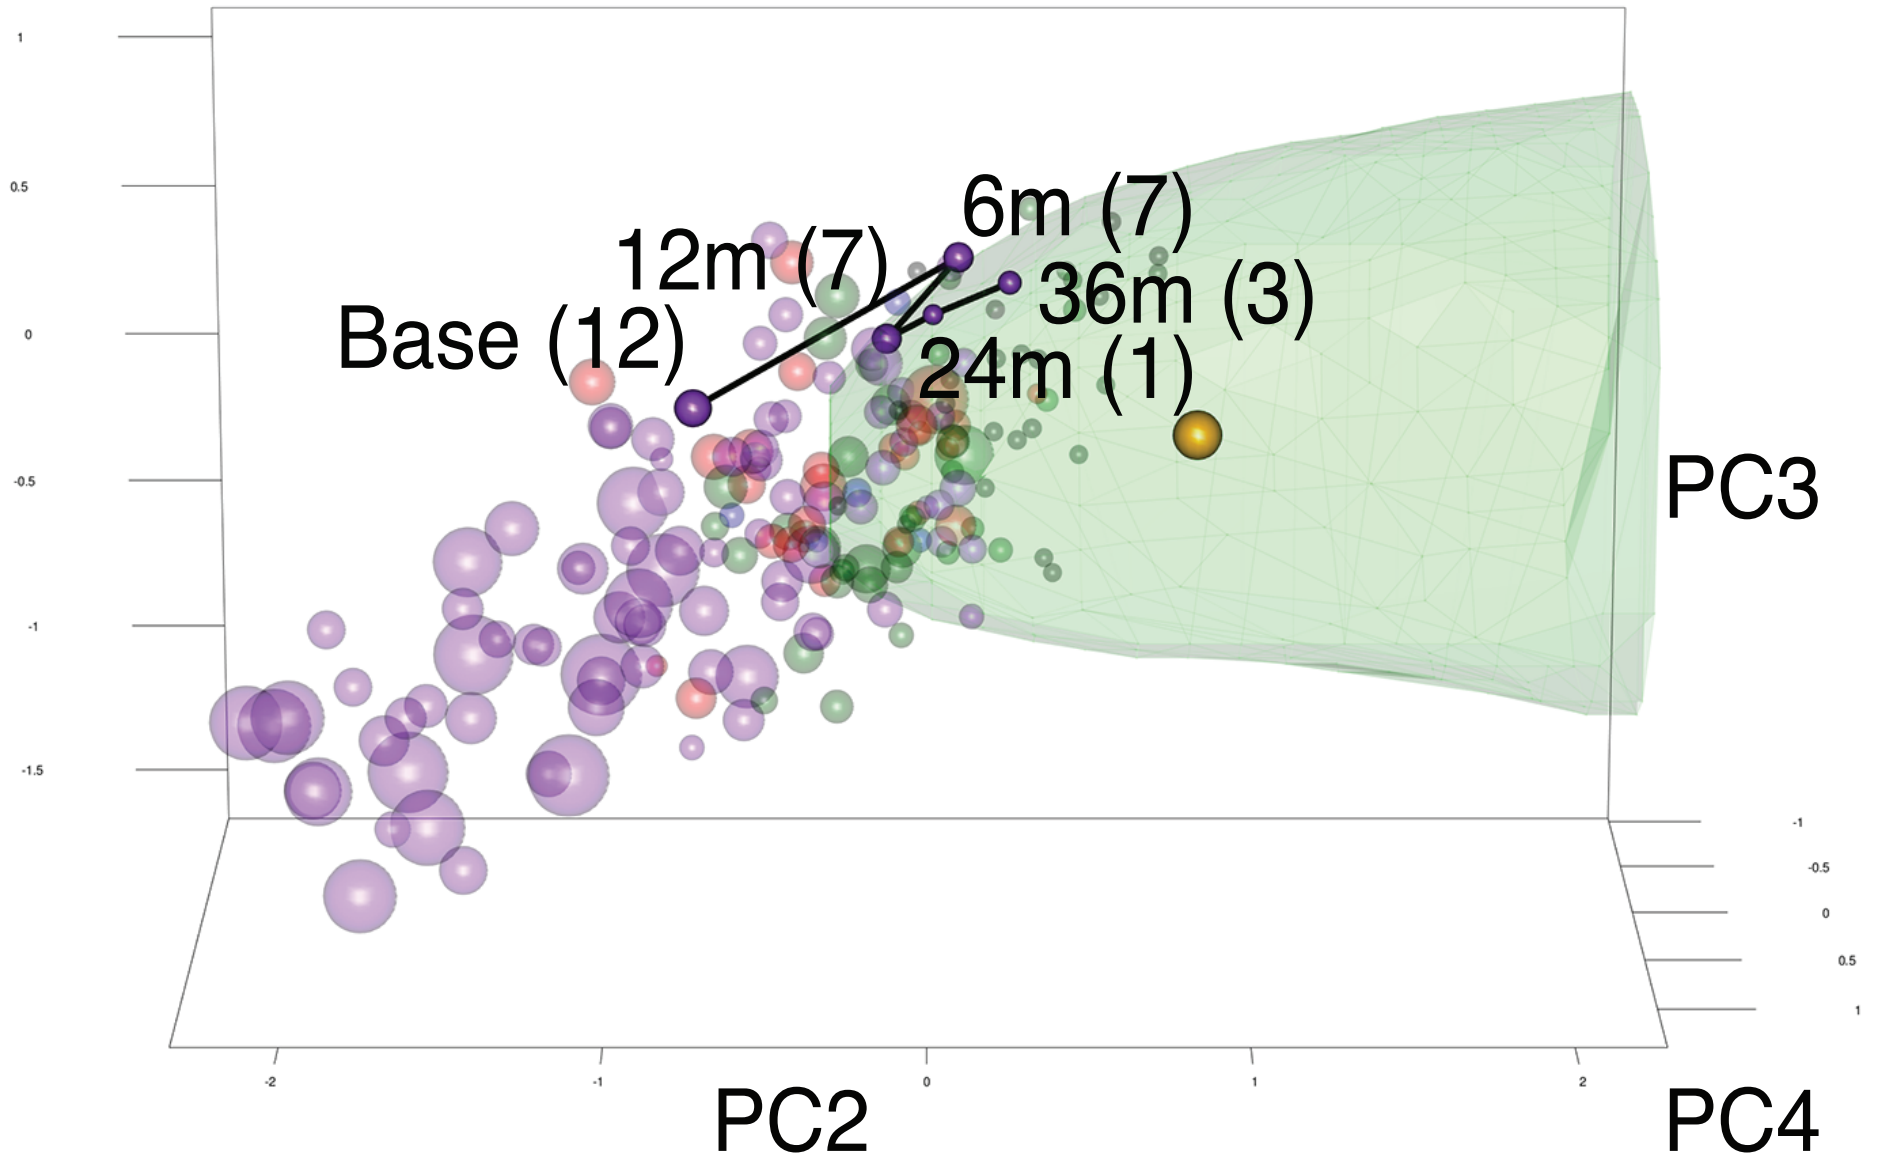

# Patient 23

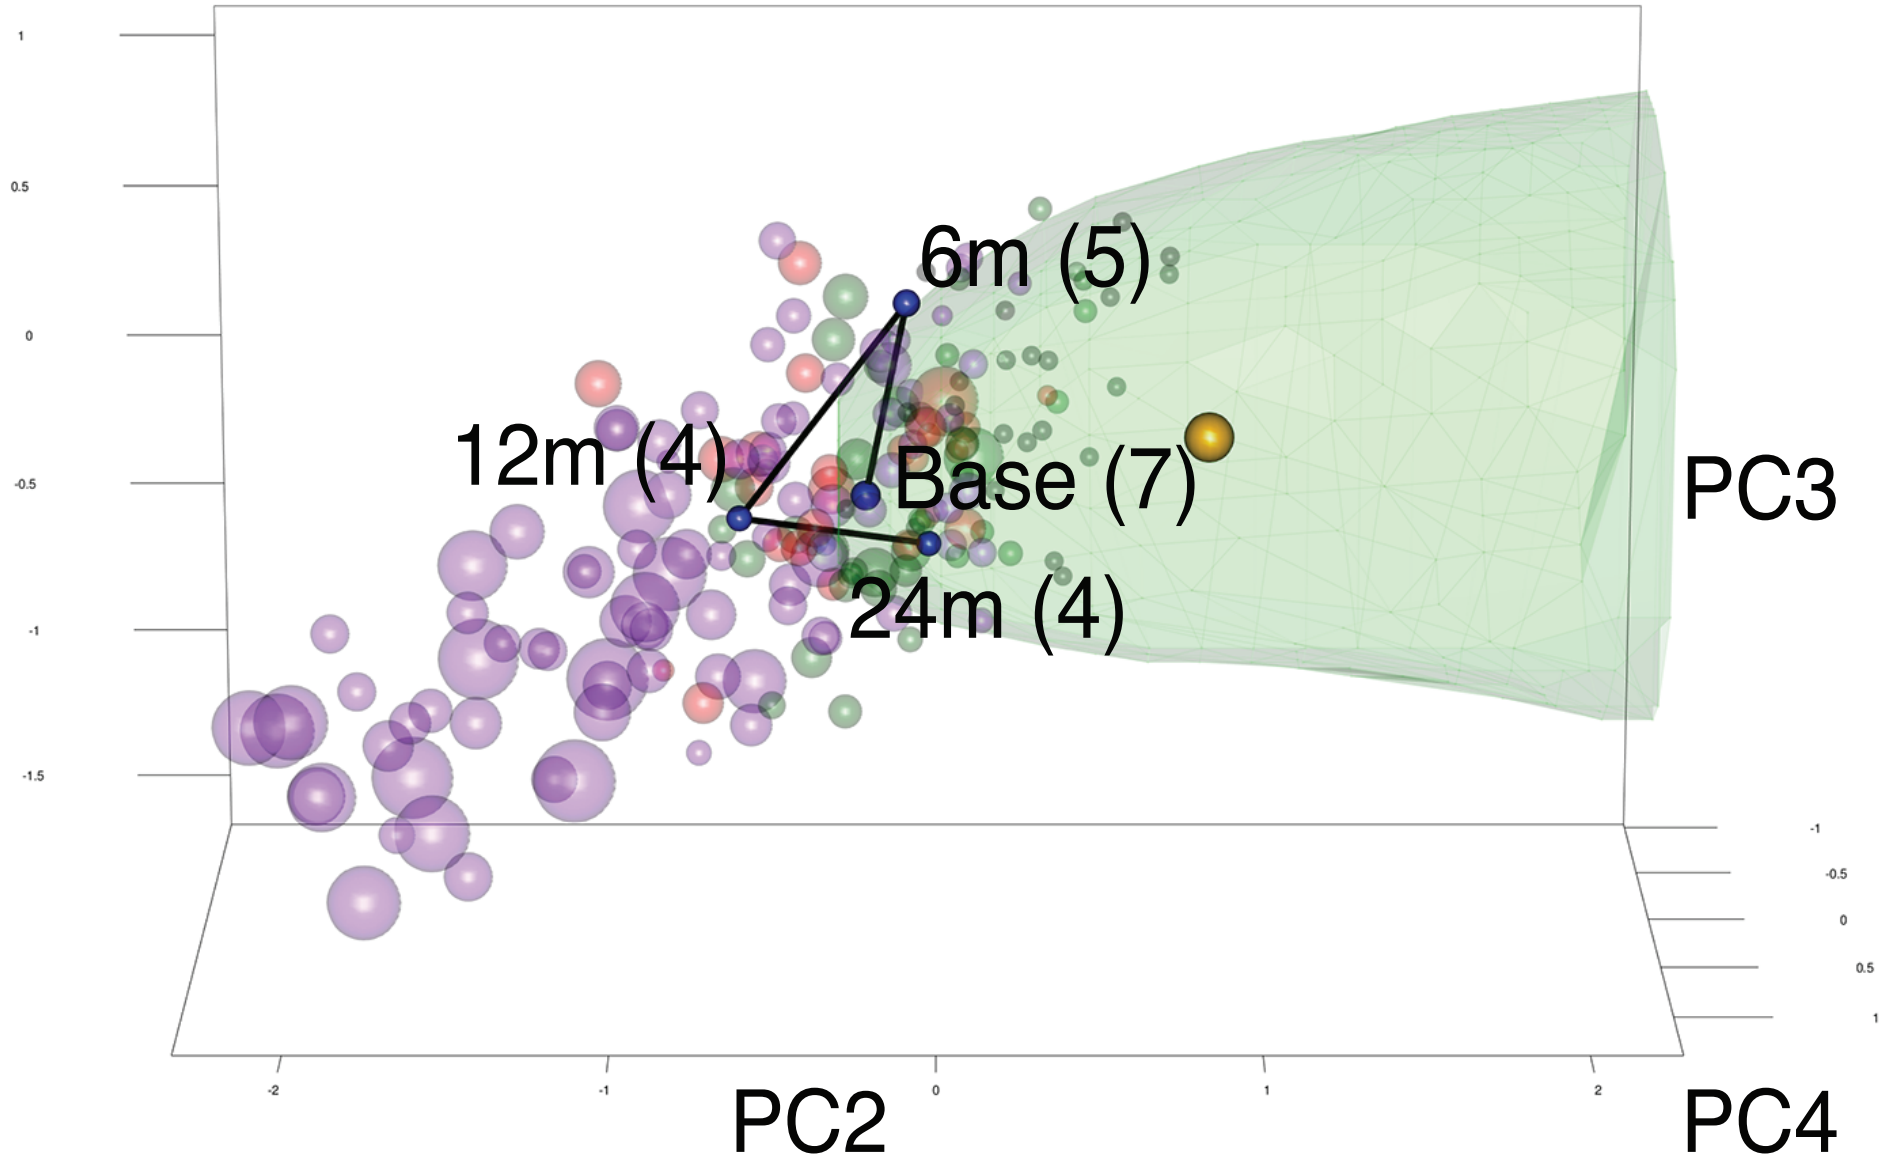

# Patient 25

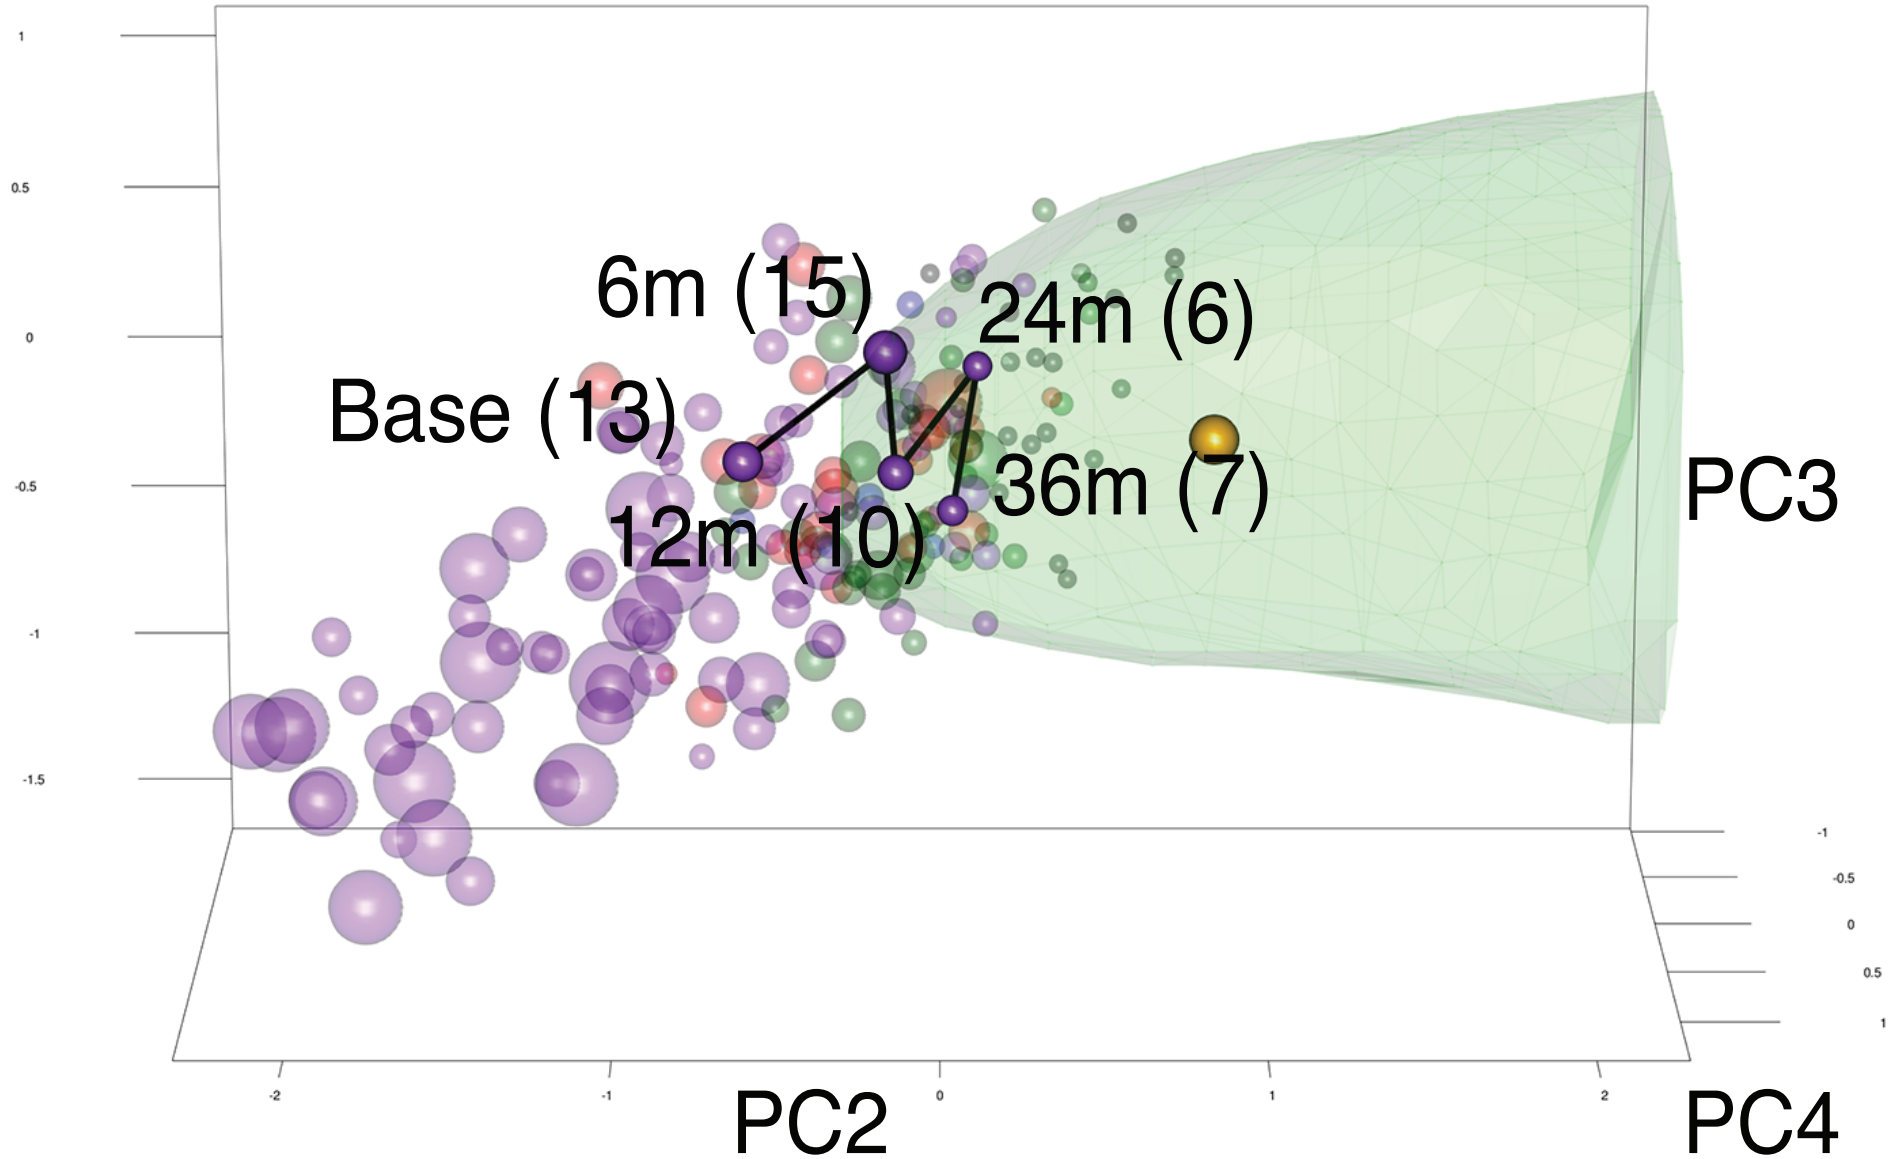

# Patient 26

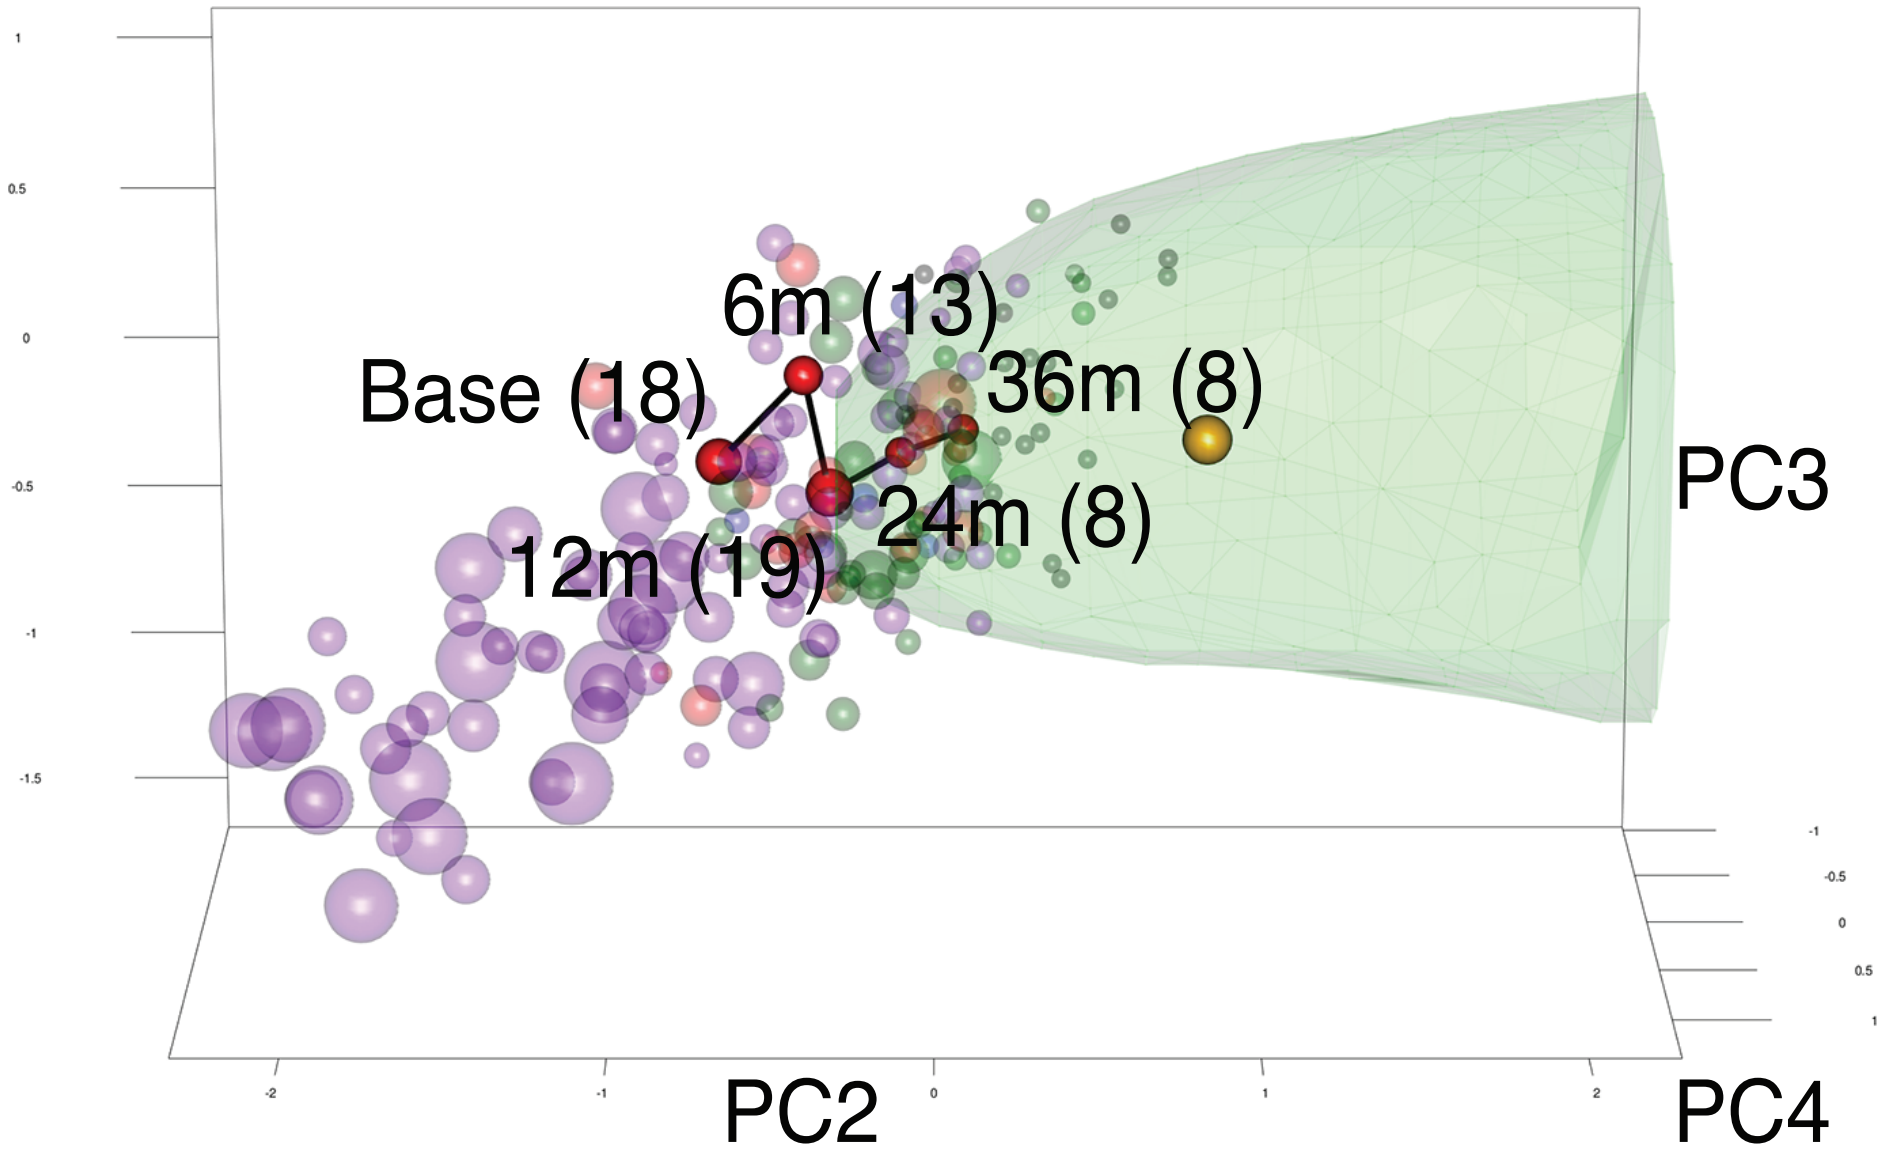

# Patient 27

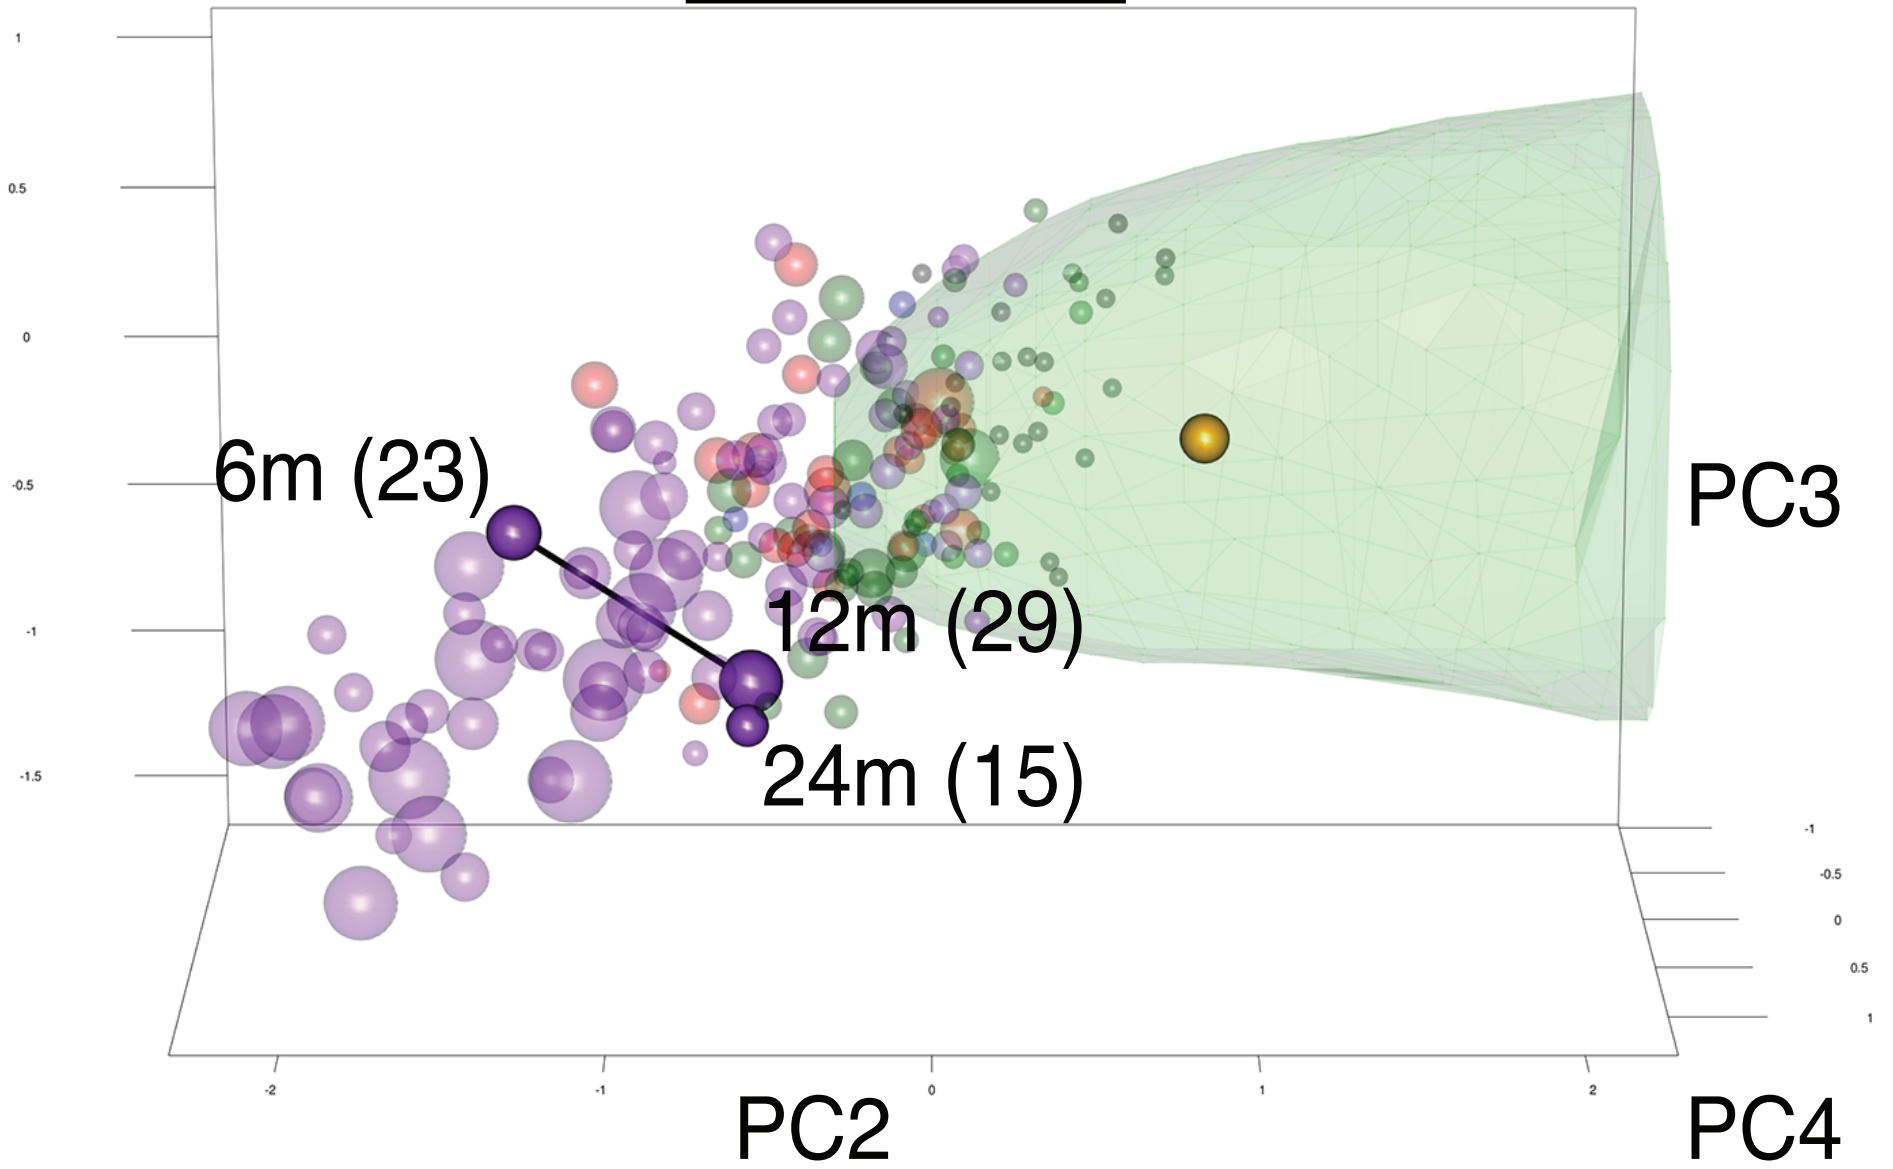



# Patient 28

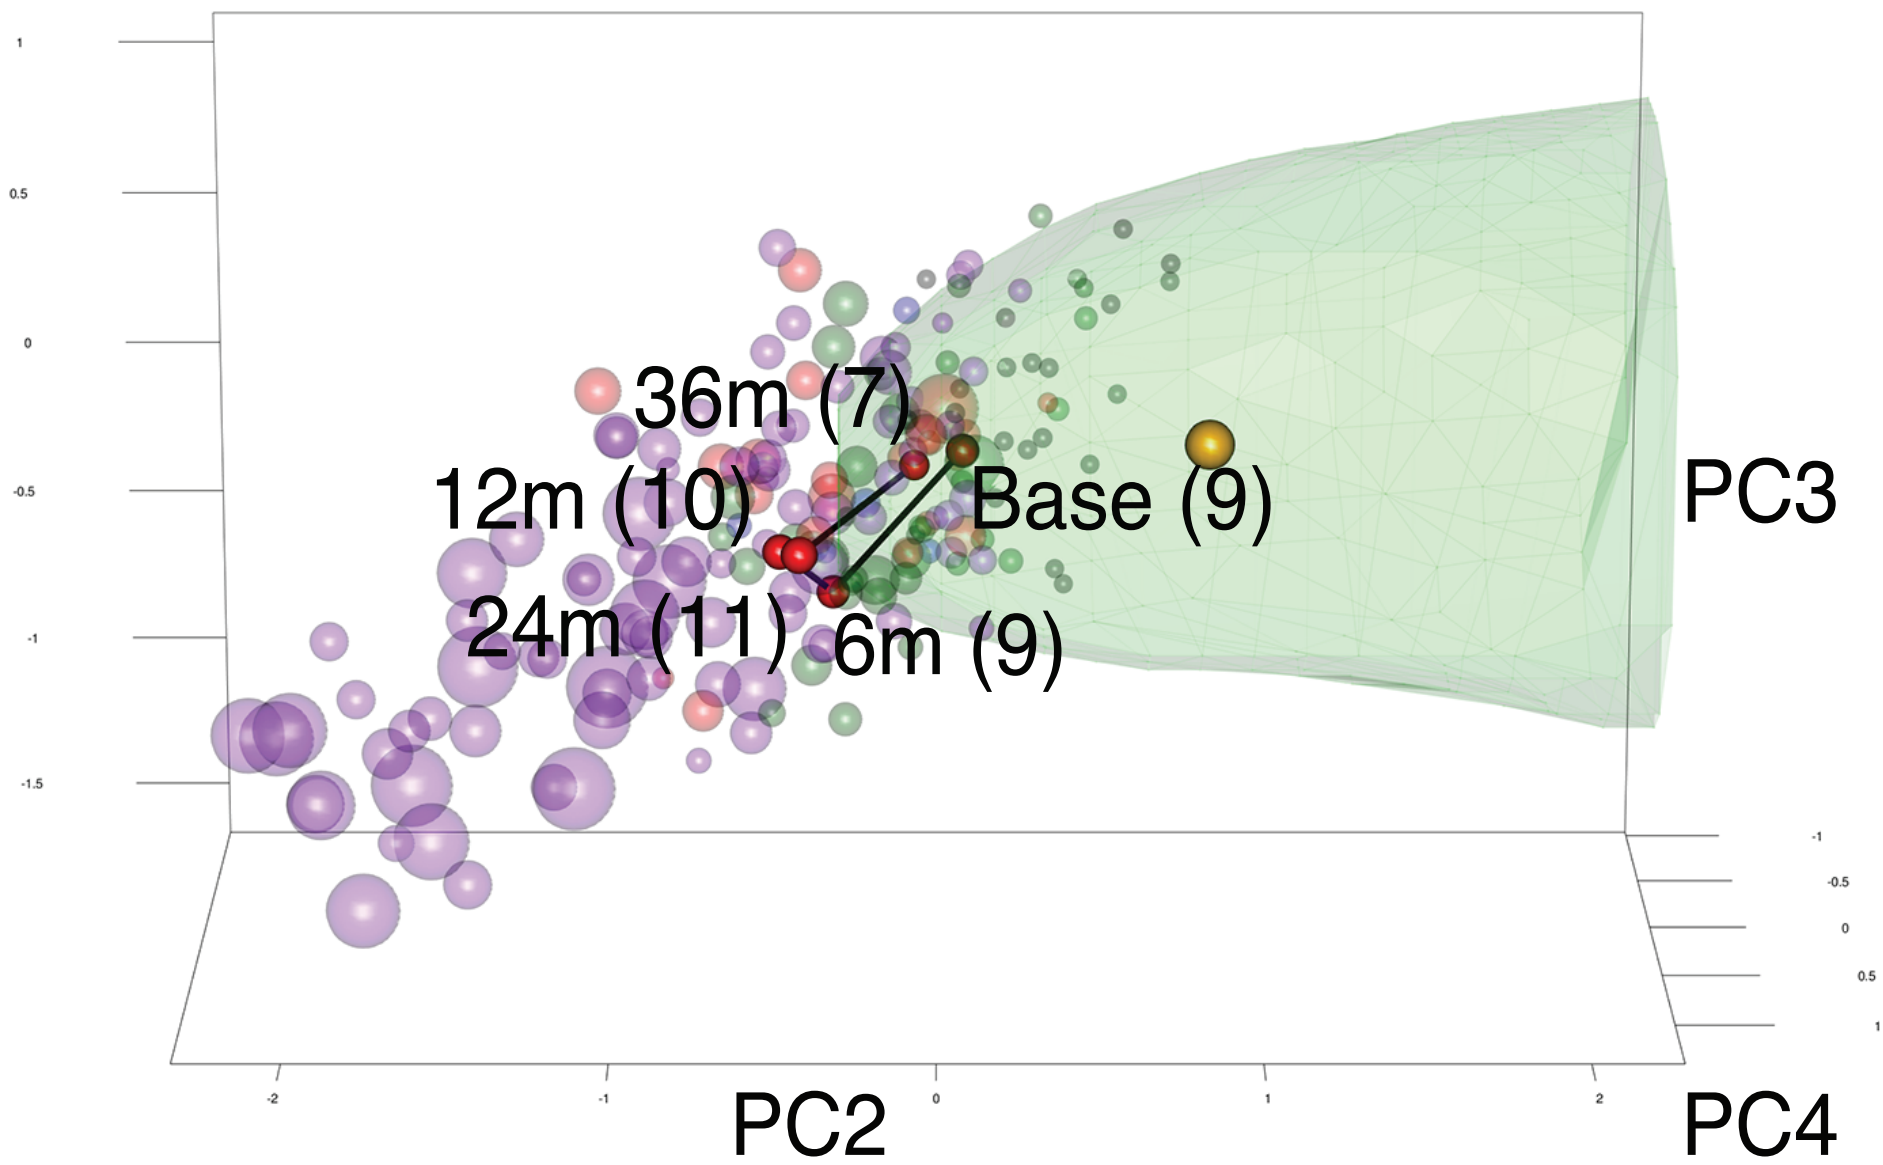

# Patient 32

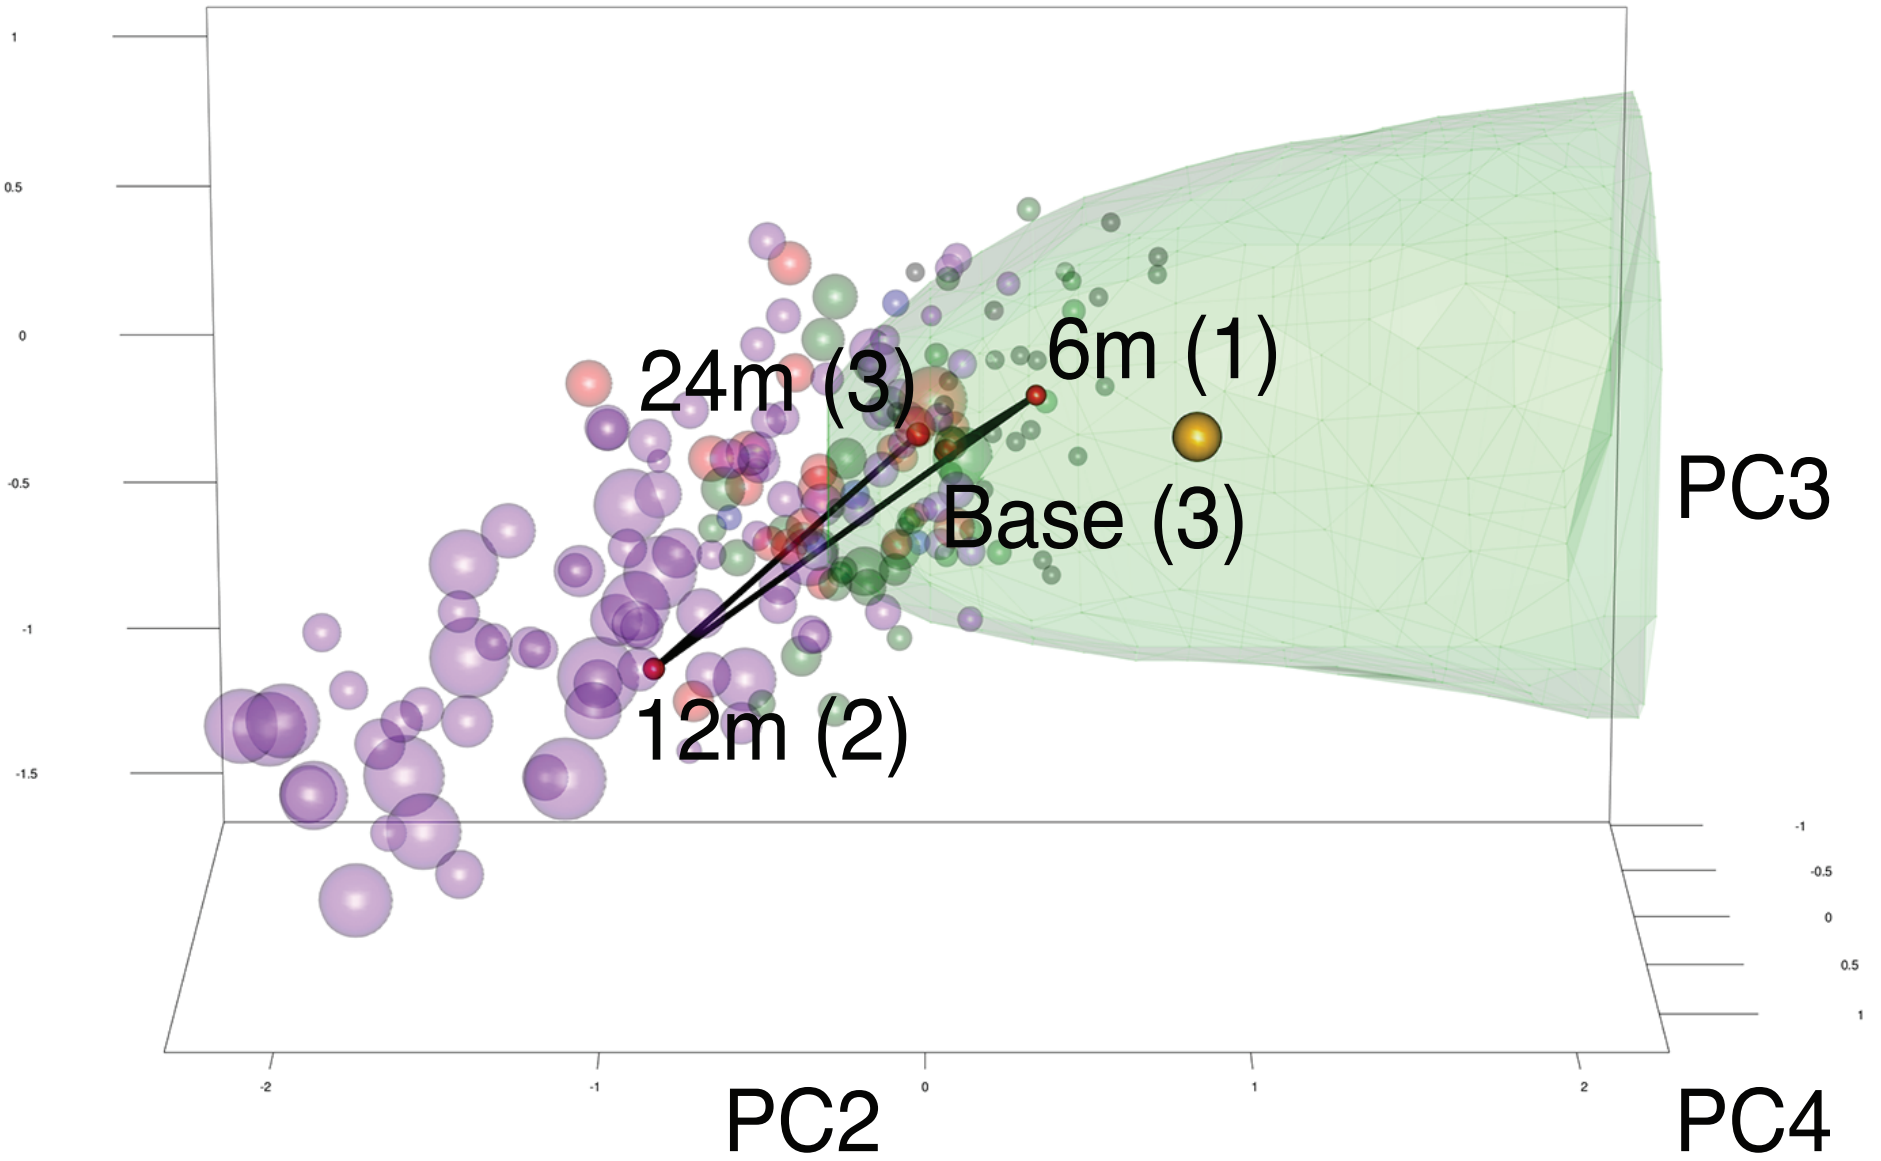

# Patient 33

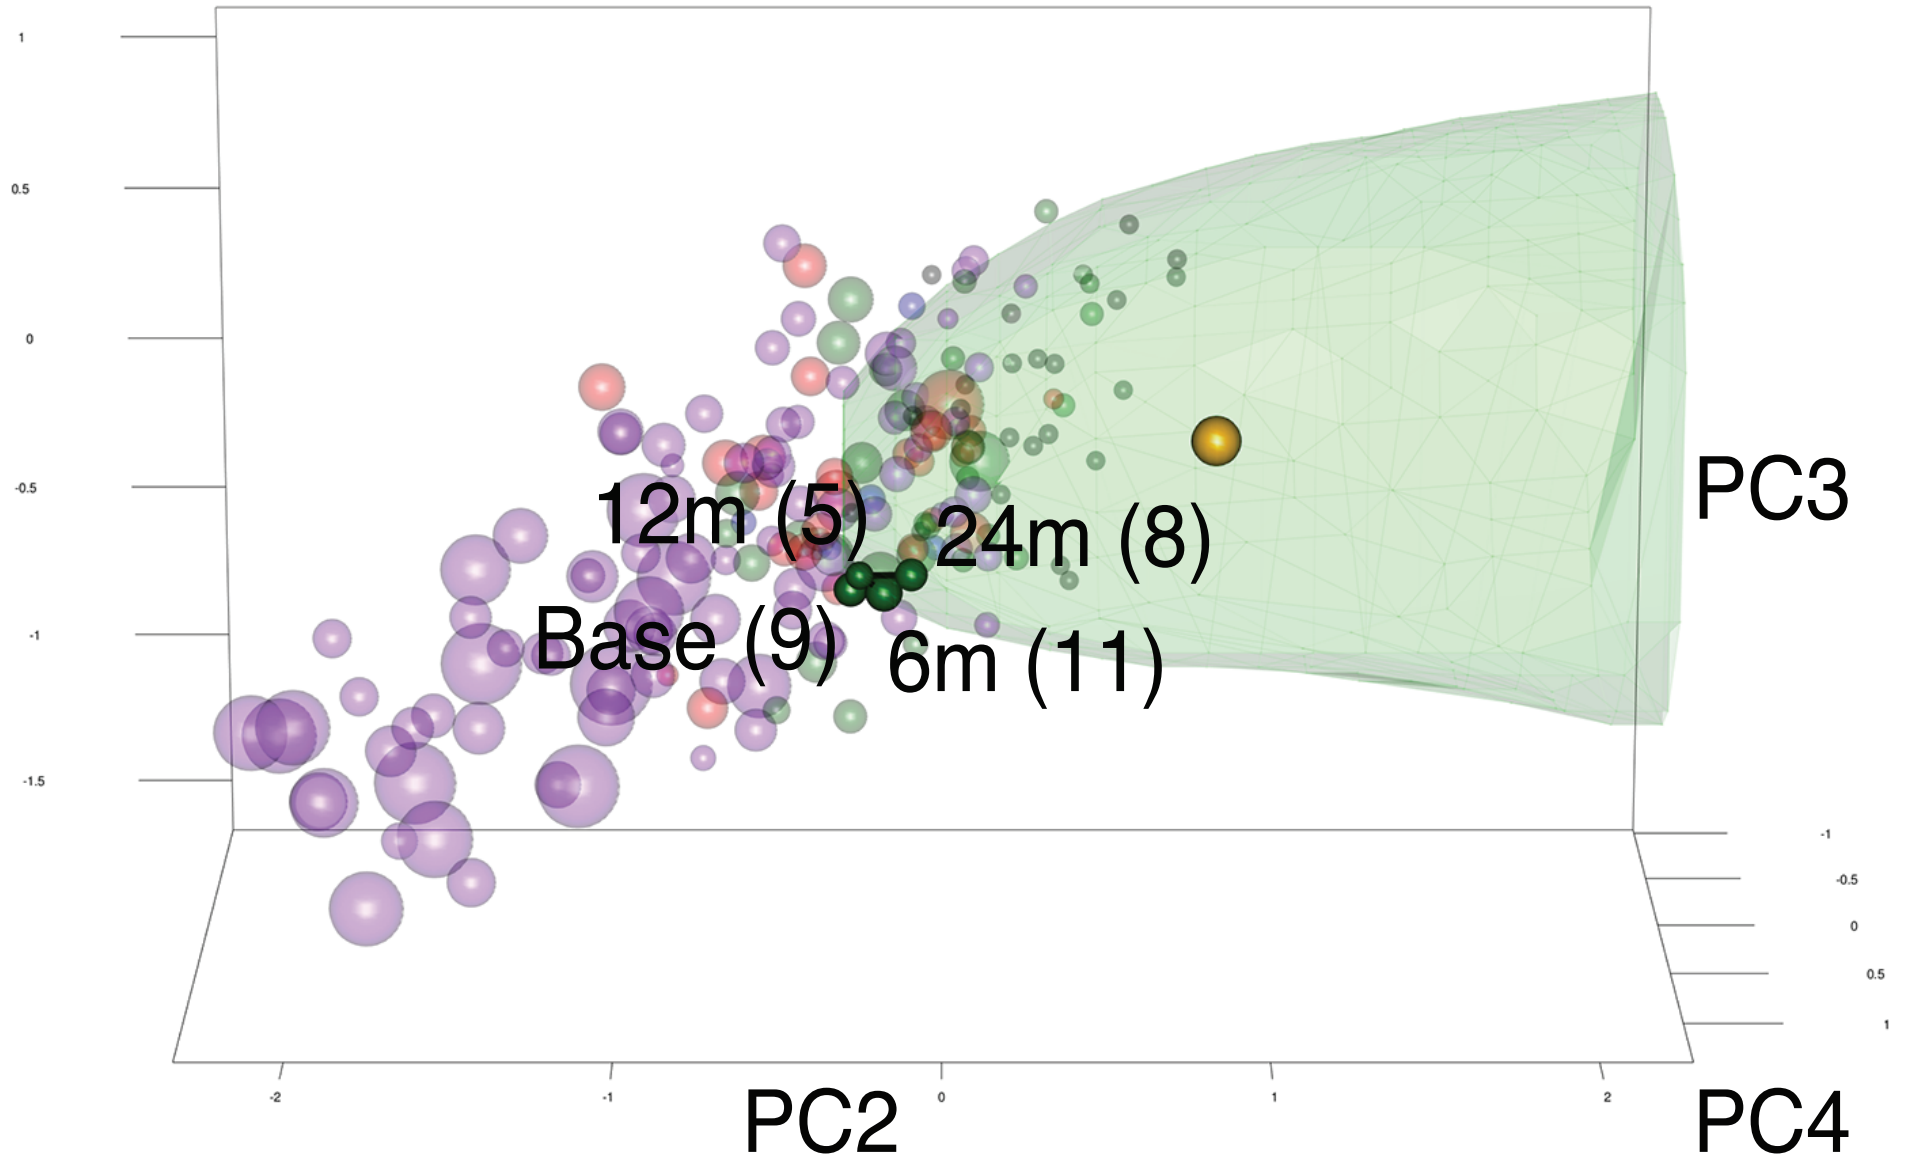

# Patient 34

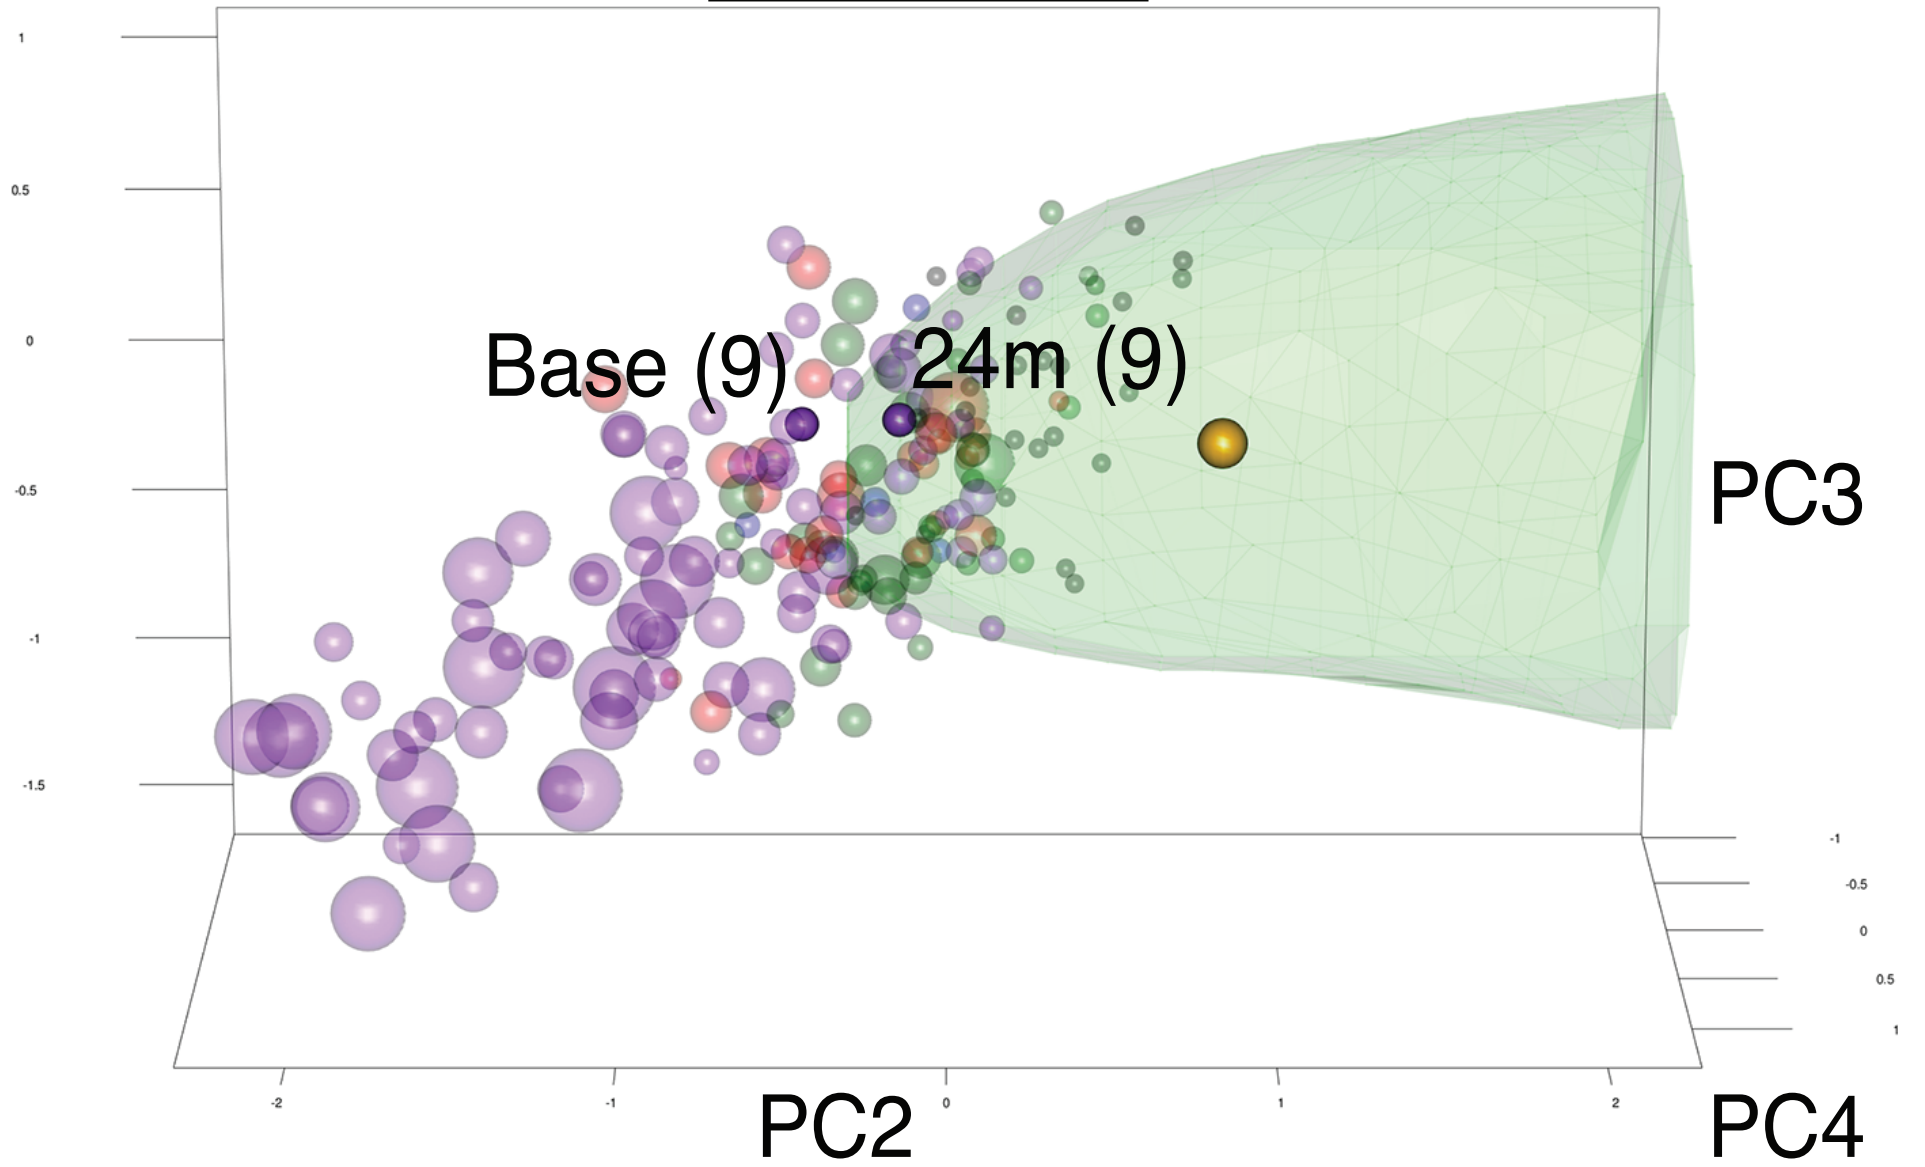

# Patient 35

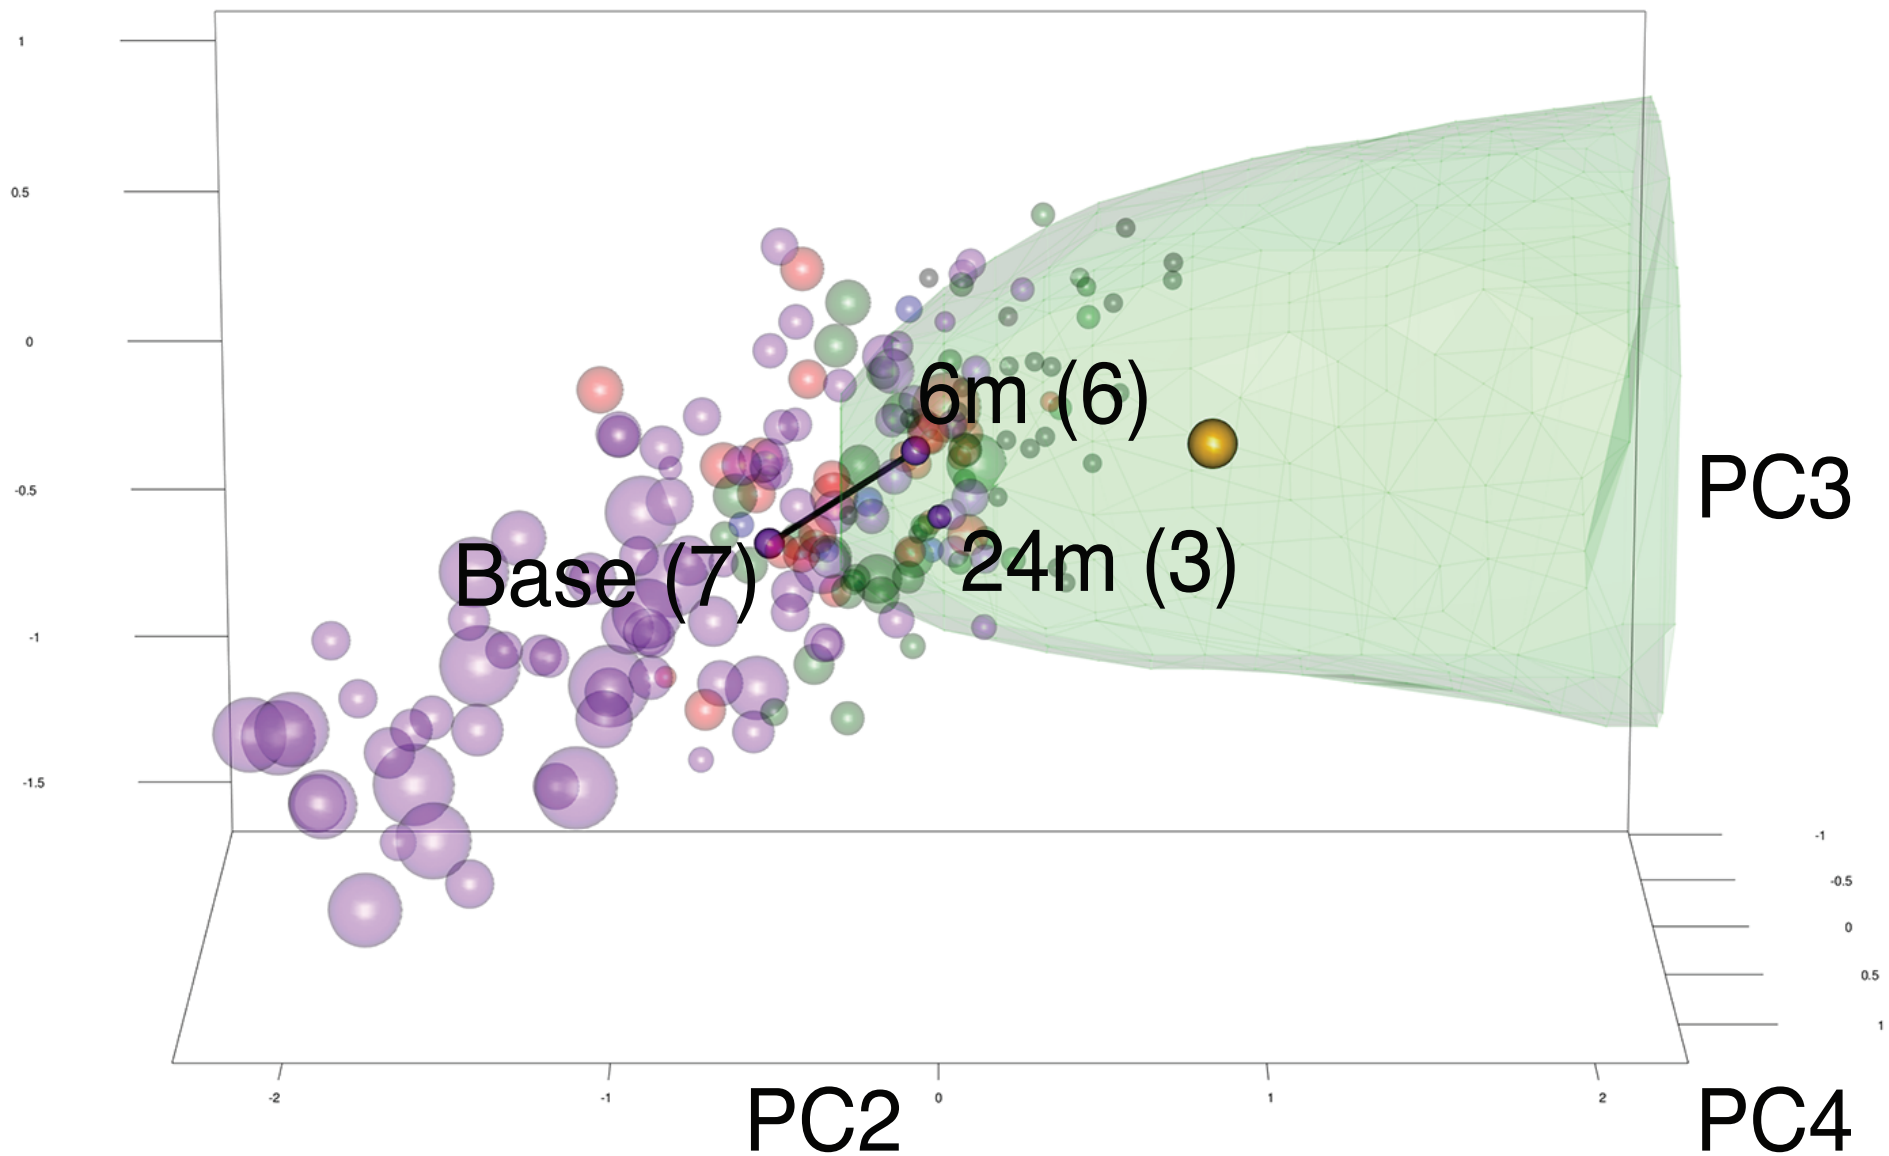

# Patient 36

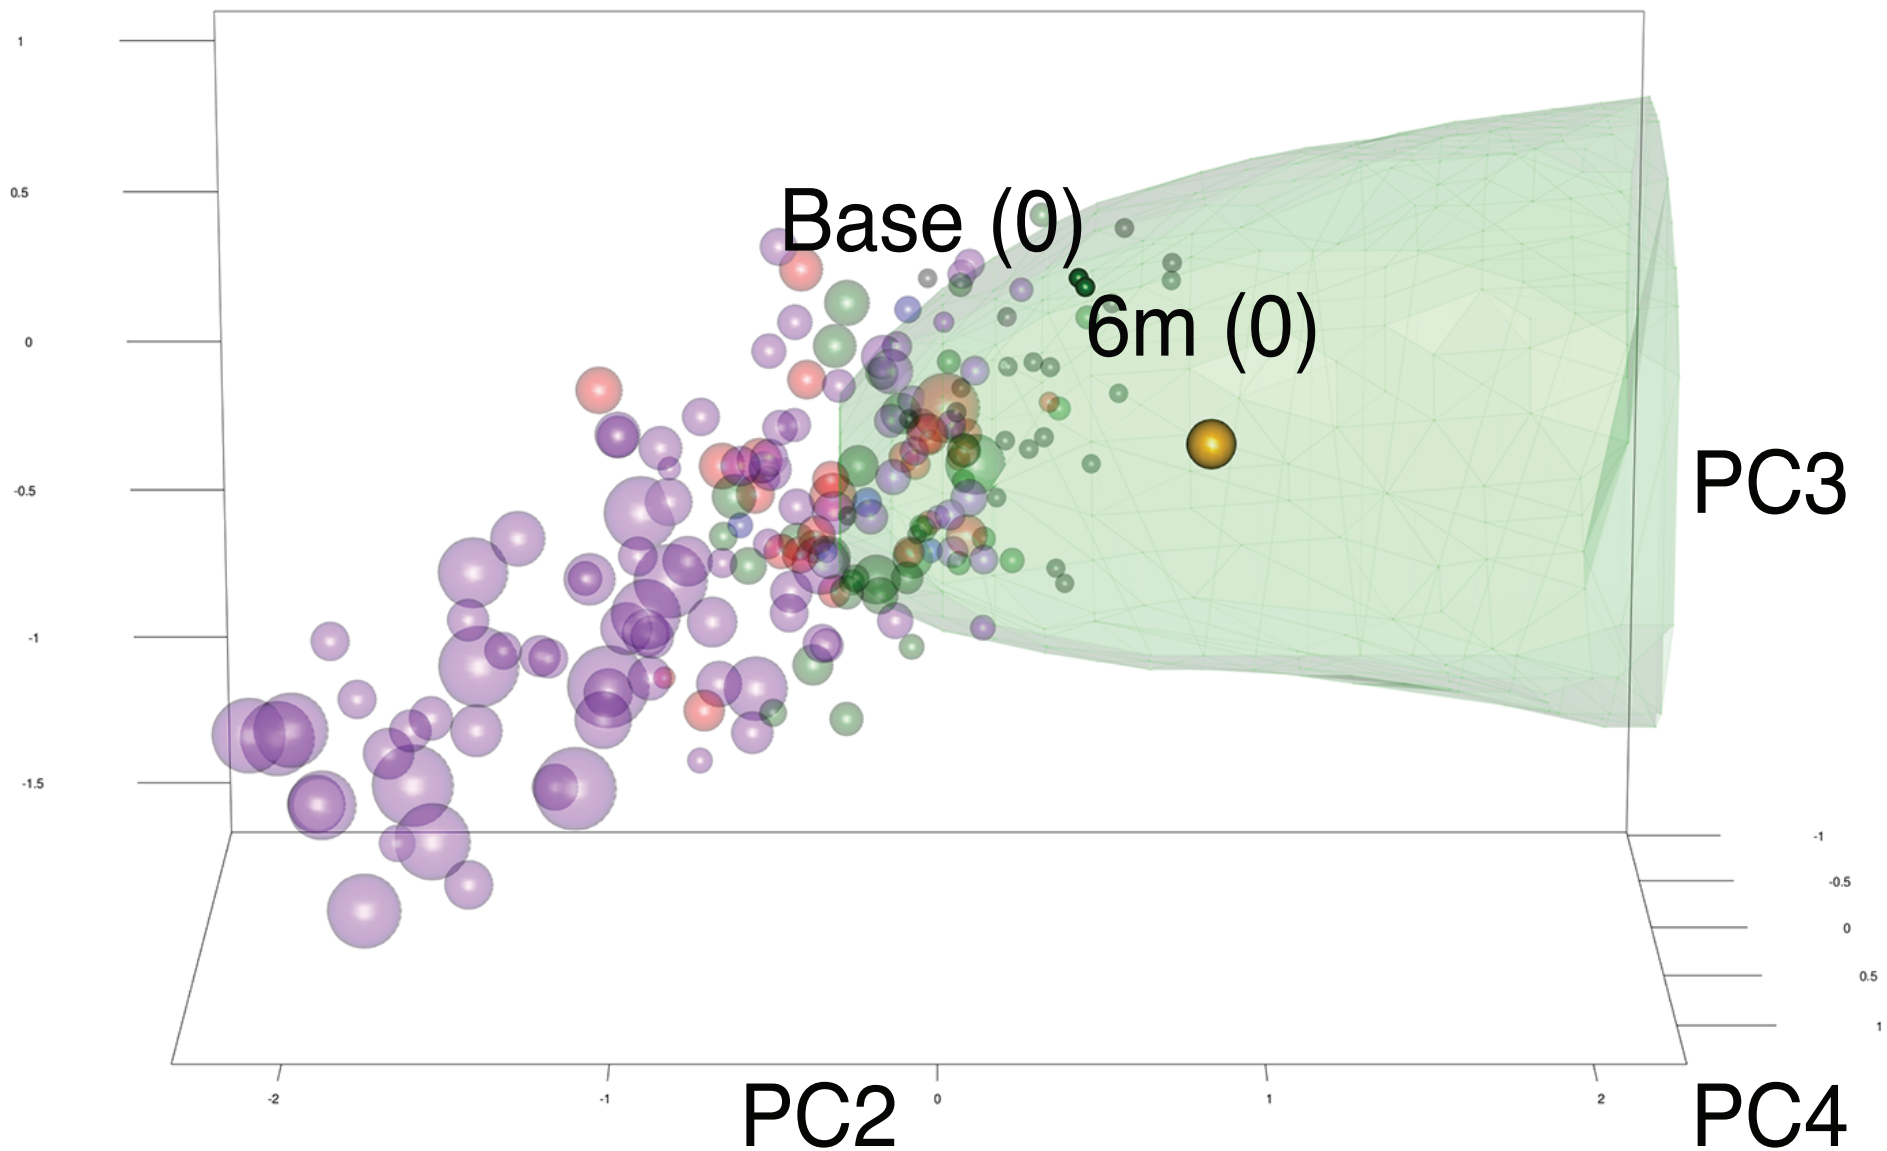

# Patient 37

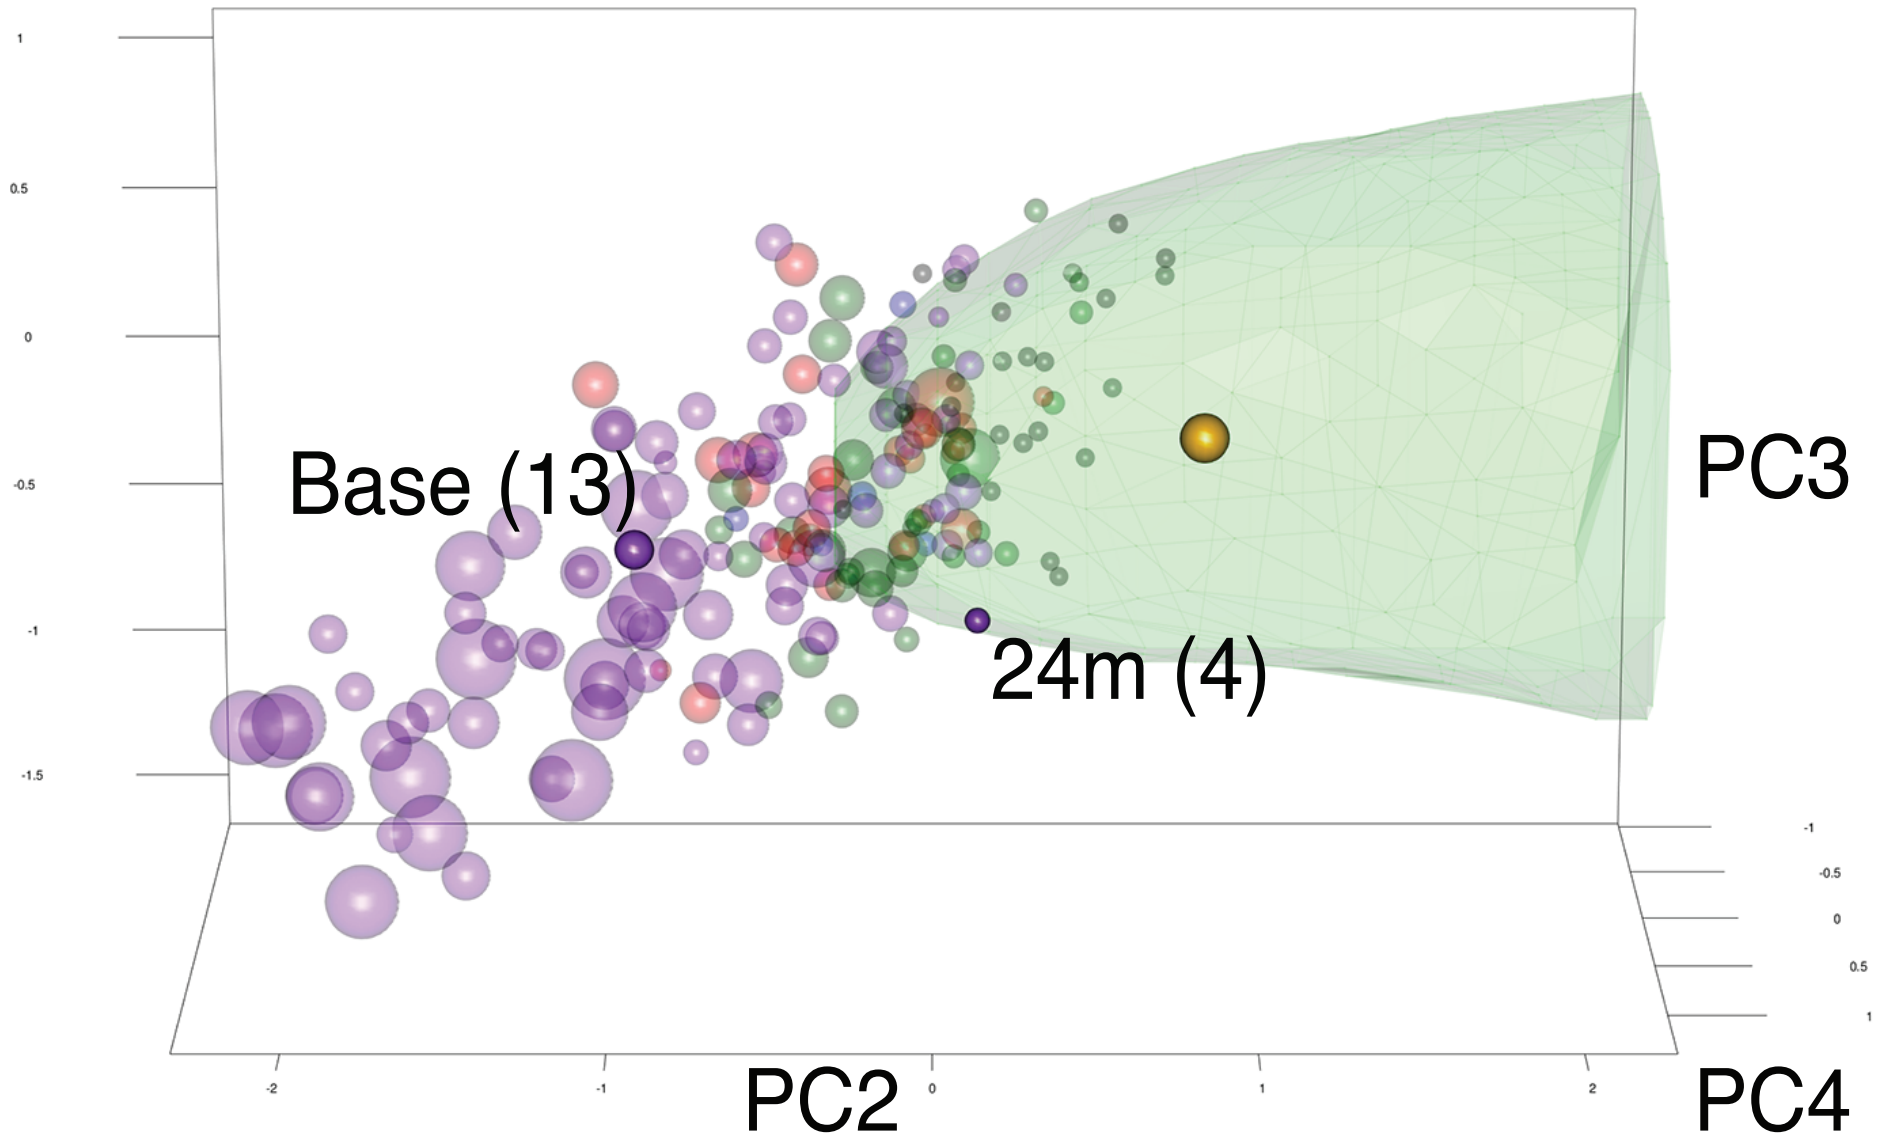

# Patient 41

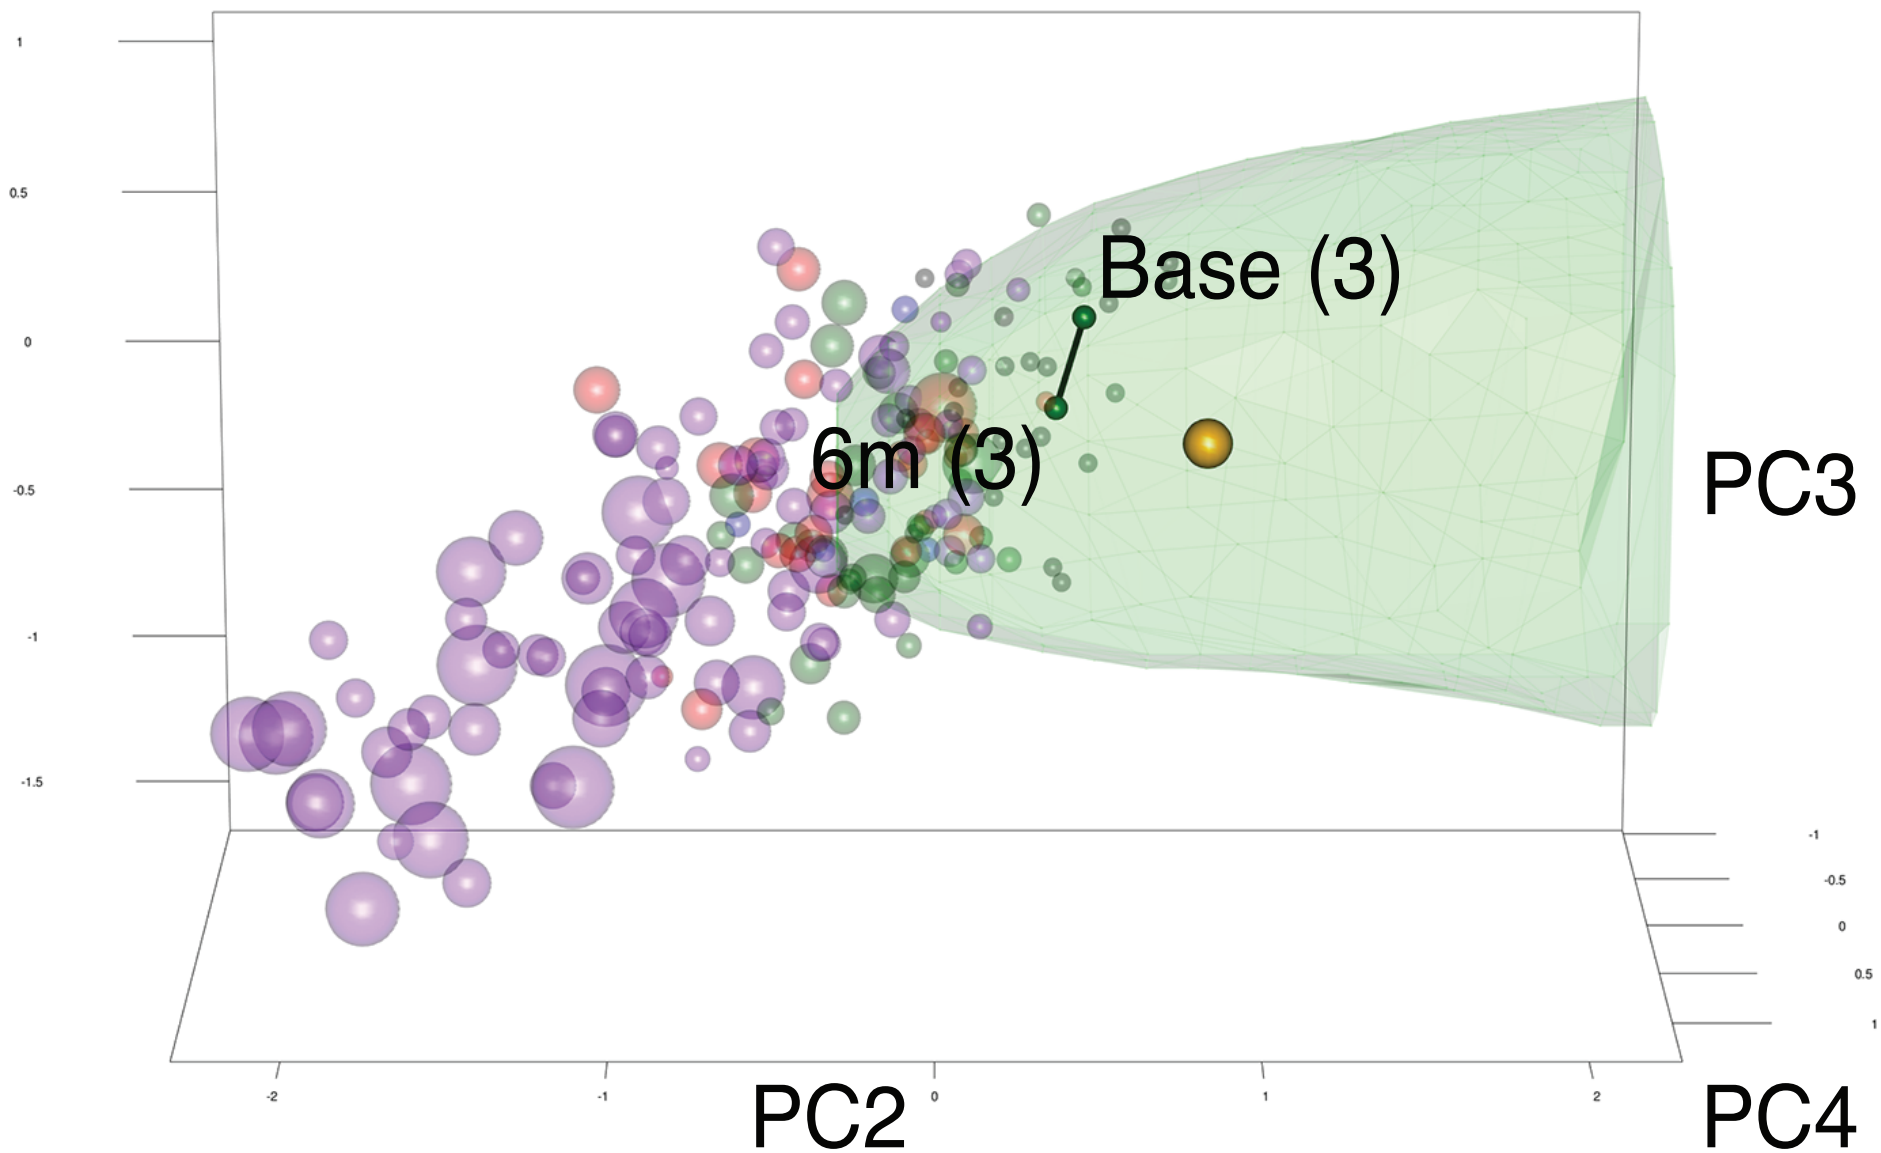



# Patient 42

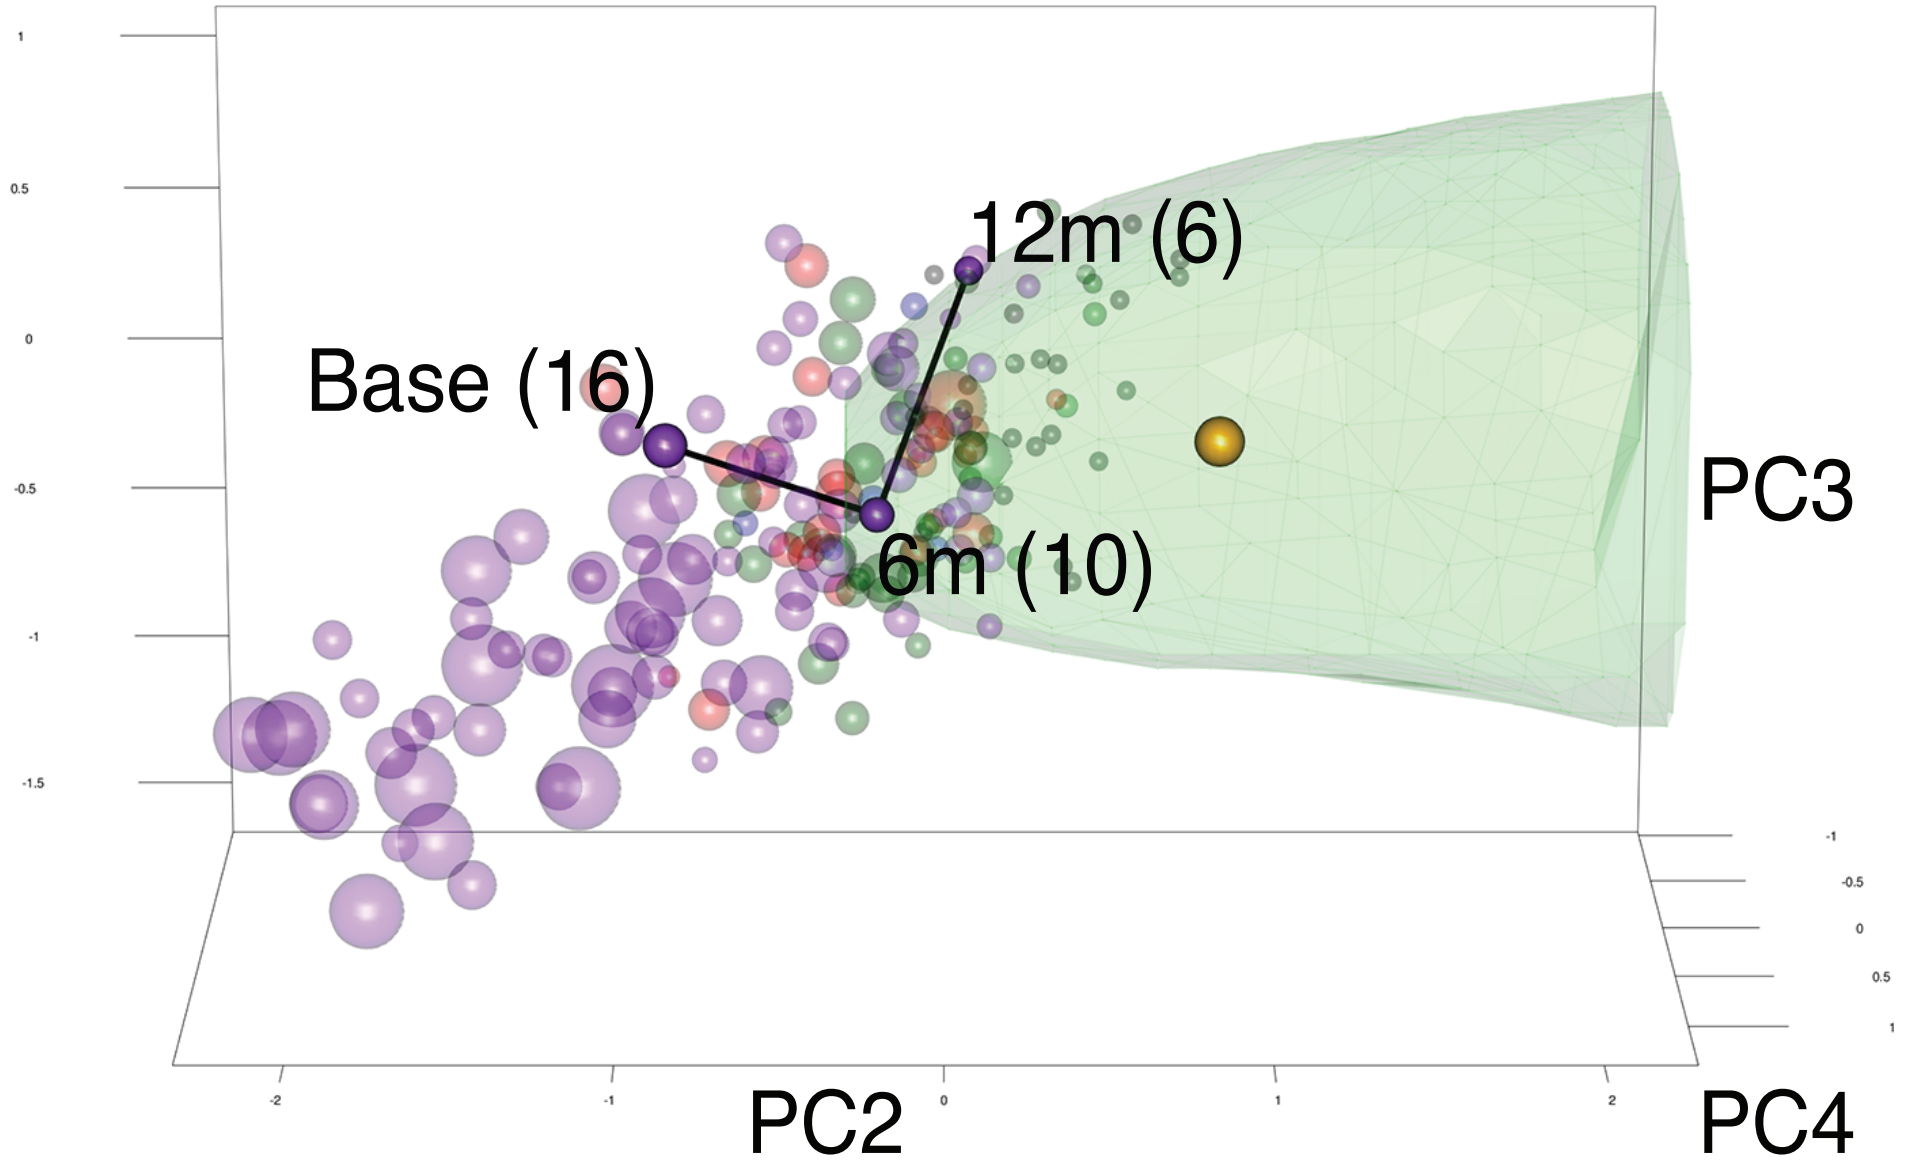

# Patient 44

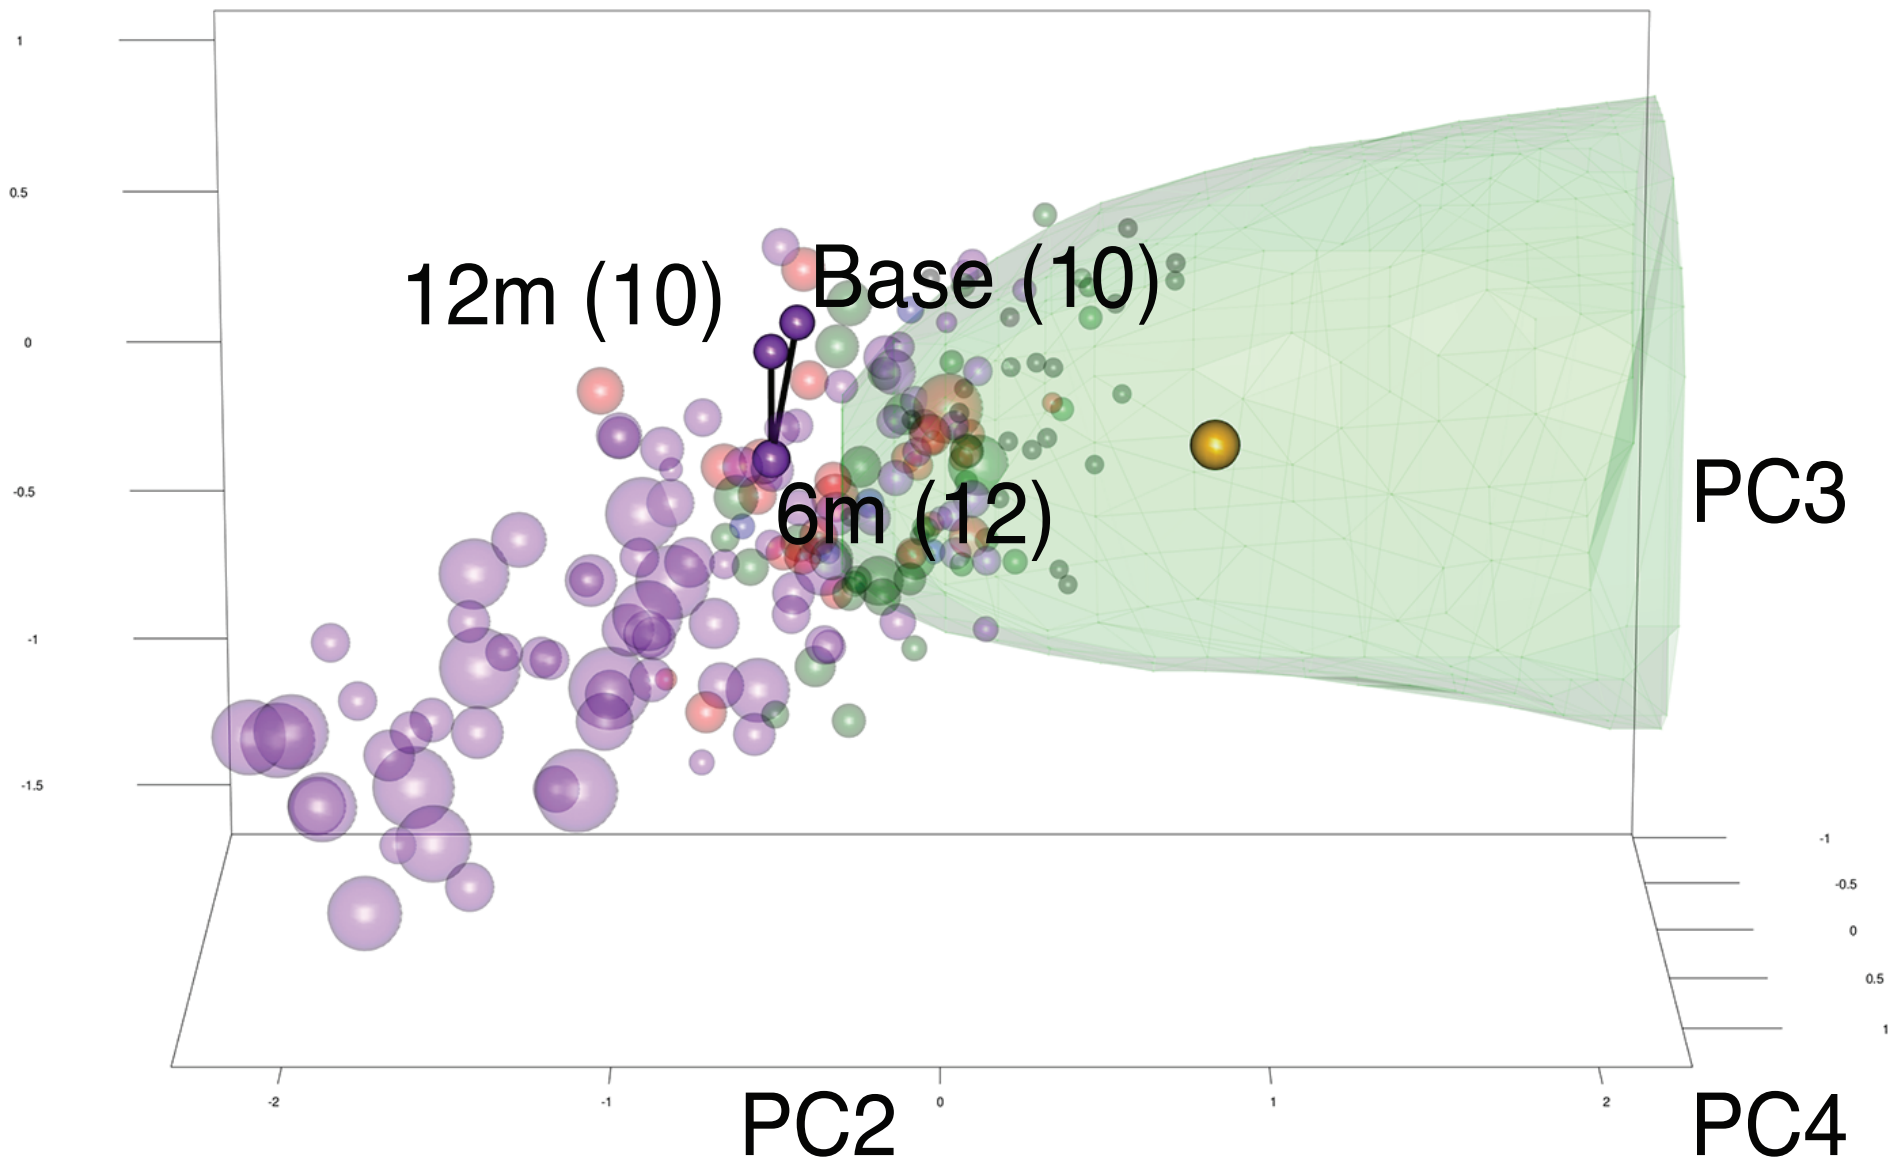

# Patient 45

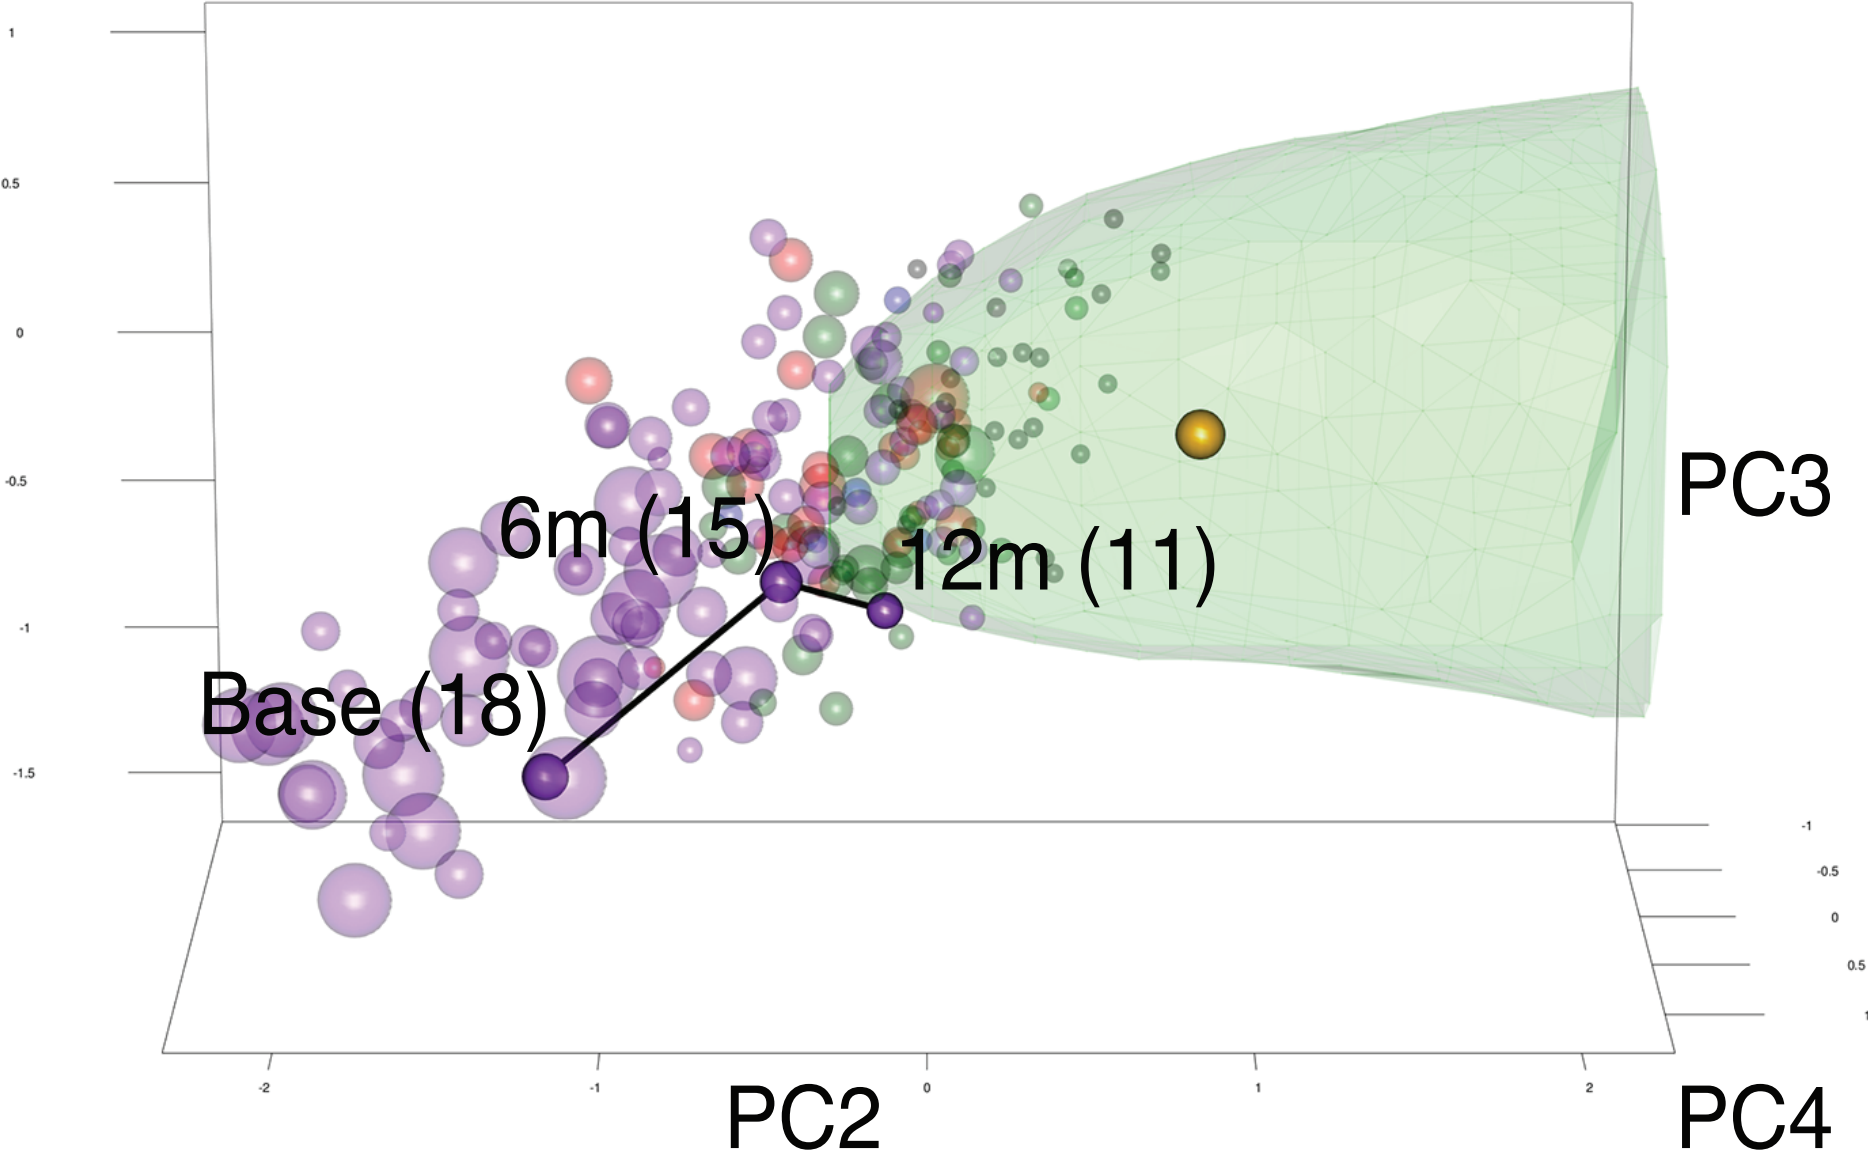

# Patient 47

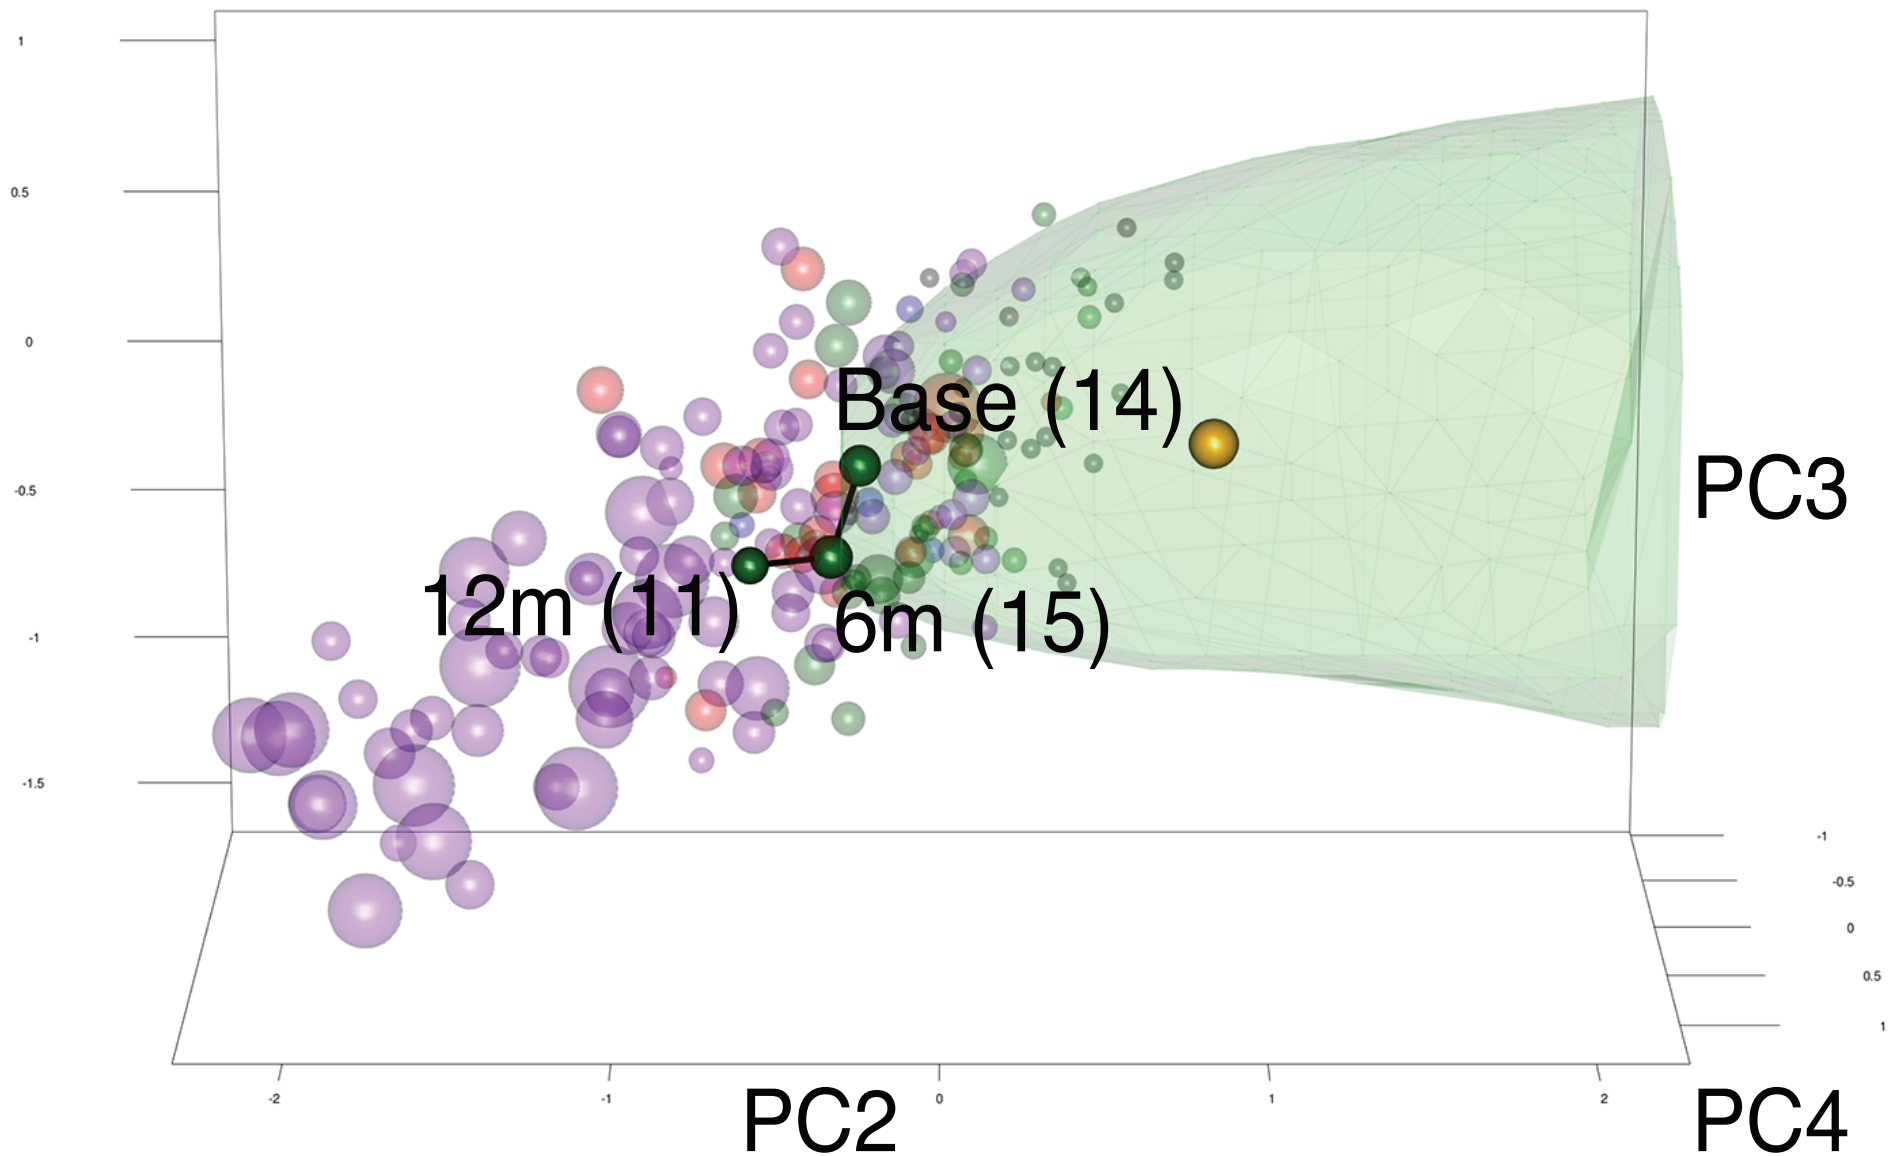

Supplementary Figure 4 (separate file): PCA of each patient in the Northwestern Cohort: Each sphere represents a skin biopsy from the Northwestern Cohort, where the size of a sphere size is proportional to mRSS and color indicates its assigned intrinsic subset (black, healthy control; green, normal-like; blue, limited; red, fibroproliferative; purple, inflammatory). The green region represents the health bubble. The golden sphere indicates the centroid of healthy controls. Numbers in brackets represent the mRSS score at a given time point for a given patient. Each figure (N = 183 for each) displays the same set of samples with different patient trajectory highlighted.
